# Vps60 initiates formation of alternative membrane-bound ESCRT-III filaments

Anna-Katharina Pfitzner<sup>§\*1</sup>, Henry Zivkovic<sup>§1,3</sup>, Frédéric Humbert<sup>1</sup>, Aurélien Roux<sup>\*1,2</sup>

<sup>1</sup>Department of Biochemistry, University of Geneva, CH-1211 Geneva, Switzerland.

<sup>2</sup>National Center of Competence in Research in Chemical Biology, University of Geneva, CH-1211 Geneva, Switzerland.

<sup>3</sup>current address: Max Planck Institute for Biochemistry, Am Klopferspitz 18, DE-82152 Martinsried, Germany.

<sup>§</sup> these authors contributed equally

\*co-corresponding authors: correspondence to [aurelien.roux@unige.ch](mailto:aurelien.roux@unige.ch); [anna-katharina.pfitzner@unige.ch](mailto:anna-katharina.pfitzner@unige.ch)

## 19 **Abstract**

20 Endosomal sorting complex required for transport-III (ESCRT-III)-driven membrane  
21 remodeling participates in many crucial cellular functions, from cell division to endosome  
22 maturation, and occurs on essentially all cellular organelles. In eukaryotes, ESCRT-III displays  
23 a remarkable molecular diversity in its subunits which may have been acquired through  
24 evolution to perform novel cellular functions. Here, we describe and characterize a novel  
25 ESCRT-III polymer initiated by the subunit Vps60. Membrane-bound Vps60 polymers recruit  
26 ESCRT-III subunits Vps2, Vps24, Did2 and Ist1, and undergo polymer turnover powered by  
27 the ATPase Vps4. Snf7- and Vps60 filaments can coexist on membranes without interacting.  
28 Their nucleation, polymerization and recruitment of downstream subunits remains unaffected  
29 by the presence of the respective other polymer. Taken together, our results suggest Vps60 and  
30 Snf7 form distinct ESCRT-III polymers, which overall, supports the notion of evolutionary  
31 diversification of ESCRT-III assemblies to perform specific cellular functions.

32

## 33 **Introduction**

34 Lipid membranes are a hallmark of living cells. To maintain functionality, they require  
35 constant remodeling by dedicated machineries like the Endosomal Sorting Complex Required  
36 for Transport-III (ESCRT-III). Presumed to be the first membrane remodeling machinery to  
37 have evolved<sup>1,2</sup>, ESCRT-III acts on virtually all cellular membranes to promote membrane  
38 fission from within membrane necks, a process that is essential for many cellular functions  
39 such as formation of intraluminal vesicles (ILVs) from endosomal membranes, cytokinetic  
40 abscission of the plasma membrane, reformation of the nuclear envelope, and closure of  
41 autophagosomes<sup>3-5</sup>. Moreover, ESCRT-III catalyzes budding of various virions in eukaryotes  
42 and archaea<sup>6-11</sup> and functions in repairing lipid membranes, as shown for the eukaryotic and  
43 bacterial plasma, lysosomal, nuclear and plastid membranes<sup>2,12-18</sup>, a function that is essential  
44 to sustain vacuolar confinement of pathogens during certain infections<sup>19,20</sup>. Unlike other  
45 membrane remodeling machineries, ESCRT-III can also function with a reverse orientation  
46 promoting membrane fission from the outside of membrane necks during release of  
47 peroxisomes, recycling of endosomes and lipid droplet formation<sup>21-23</sup>. Despite its ubiquitous  
48 role in vital functions, the mechanism by which ESCRT-III performs membrane remodeling  
49 and the machinery's adaptation to its various cellular functions is not fully understood.

50 Canonically recruited to endosomal membranes by ESCRT-II, ESCRT-III assembly  
51 starts with Vps20 (CHMP6) followed by subunits Snf7 (CHMP4B), Vps2 (CHMP2A) and

52 Vps24 (CHMP3) before being likely completed by subunits Did2 (CHMP1B) and Ist1 (IST1).  
53 Besides the canonical pathway, other nucleators such as Bro1 (ALIX) and Chm7 (CHMP7)  
54 can recruit ESCRT-III to diverse cellular membranes<sup>24-29</sup>. Vps2 and Vps24 as well as Vps2  
55 and Did2 bind Snf7 synergistically and then recruit the AAA-ATPase Vps4<sup>30-36</sup>, which induces  
56 subunit turnover within ESCRT-III polymers promoting either disassembly<sup>37-39</sup>, growth<sup>40</sup> or  
57 sequential subunit polymerization<sup>41</sup>. In cells, Vps4-dependent polymer remodeling is  
58 indispensable for ESCRT-III function<sup>40,42,43</sup>. Upon recruitment, ESCRT-III subunits assemble  
59 into filaments with diverse stoichiometries and shapes ranging from spirals<sup>44-47</sup> to tubular  
60 helices<sup>37,48-51</sup> and spiraling membrane tubes<sup>52,53</sup>. Sequential succession of these various  
61 ESCRT-III filaments has recently been suggested to promote ESCRT-III mediated membrane  
62 remodeling<sup>54,55</sup>.

63         Aside from the well characterized core subunits Snf7, Vps2 and Vps24, several  
64 accessory ESCRT-III subunits have been identified based on a deletion phenotype indicative  
65 of disturbed ILVs formation<sup>56</sup> and their secondary structure organization<sup>57</sup>, which is highly  
66 conserved among ESCRT-III proteins even across species. As one of those accessory subunits,  
67 the function of Vps60/Mos10 (CHMP5), though briefly associated with ESCRT-III  
68 disassembly<sup>58,59</sup>, remains poorly understood to this day. A recent analysis of genetic  
69 interactions between ESCRT-III subunits, however, places Vps60 more central in an  
70 interaction network<sup>36</sup> implying potentially a more important function for Vps60 than  
71 previously recognized. We thus decided to perform a functional characterization of Vps60 and  
72 its interactions with other ESCRT-III subunits as well as the ATPase Vps4.

73

74

## 75 **Results**

### 76 **Vps60 behaves like an early ESCRT-III protein**

77         We here set out to characterize the function of ESCRT-III accessory subunit Vps60. In  
78 general, most ESCRT-III subunits or submodules, though to varying degrees, can polymerize  
79 into membrane-bound filaments which often depict preferential binding to a specific membrane  
80 curvature range<sup>53,60,61</sup>. Snf7, the initial ESCRT-III subunit, polymerized spontaneously (Fig.  
81 1A) on giant unilamellar vesicles (GUV), whereas downstream submodules Vps2-Vps24 (Fig.  
82 1C)<sup>61,62</sup> and Vps2-Did2-Ist1 (Fig. 1D)<sup>41</sup> required activation, here provided by an acidic buffer  
83 (Fig. 1A), to polymerize. Interestingly, Atto565-Vps60 bound spontaneously to GUVs (Fig.

84 1B) and was, similar to Snf7, recruited efficiently to flat non-deformable supported lipid  
85 bilayers (SLBs) (Fig. S1A-B).

86 After establishing Vps60's affinity for membrane, we next asked whether the protein  
87 depicts a membrane curvature-preference. To this end, we injected labeled subunits in the  
88 vicinity of membrane nanotubes, the latter made by pulling beads adhered to GUVs with optical  
89 tweezers (see Methods and Fig. 1E). The described set-up produces highly curved and flat  
90 membranes close to each other, allowing us to evaluate curvature-dependent binding in a wide  
91 range. As previously reported, Snf7 bound exclusively flat membrane (Fig. 1E, S1C)<sup>61</sup>.  
92 Likewise, Vps60 is strongly recruited along the GUV's flat membrane, whereas only minor  
93 binding is observed along the highly curved nanotube (Fig. 1E, S1E). In contrast, both  
94 downstream ESCRT-III submodules, Vps2-Vps24 and Vps2-Did2-Ist1, bind predominantly to  
95 highly curved nanotubes (Fig. 1E, S1D, F).

96 Upon membrane binding, all characterized ESCRT-III subunits polymerize into  
97 filaments<sup>44-47,49,52,63,64</sup>. To test if Vps60 behaves likewise, we performed negative stain electron  
98 microscopy of large unilamellar vesicles (LUVs) incubated with Vps60. Indeed, Vps60 formed  
99 ring-shaped filaments with an average diameter of  $18.9 \pm 3.4$  nm (Fig. 1F-H) similar to ring  
100 filaments described for Snf7<sup>60,65</sup>. In disagreement with our findings, a recent study reported  
101 Vps60 to form wide ranging spirals reminiscent to the Snf7 ones<sup>66</sup>. This discrepancy might  
102 arise from different experimental conditions as Banjade and colleagues used higher protein  
103 concentration which might help propagating spiral growth. Besides rings, we observed  
104 polymers with one inward-curved tip as it would be expected for a spiral initiator (Fig. 1F, H).  
105 Snf7 spiral polymers were previously suggested to grow out of ring-shaped filaments upon  
106 their spontaneous breakage<sup>60,67</sup>. In analogy, curled Vps60 polymers might arise from rupture  
107 of ring filaments. The lack of large spirals may potentially be due to filament-specific  
108 properties that control its polymerization rate such as filament thickness which is higher for  
109 Vps60- ( $6.7 \pm 1.3$  nm, Fig. 1G) than for Snf7-filaments (5 nm)<sup>65,68</sup>. Alternatively, curled  
110 filaments might result from ring breakage during sample preparation. We occasionally  
111 observed filaments which resemble stacks of rings (Fig. 1F), which might arise from buckling  
112 of curled filaments similar to buckling of other ESCRT-III polymers<sup>52,65</sup>.

113 In summary, Vps60 depicts characteristics similar to the early ESCRT-III protein Snf7  
114 and clearly distinct from the properties of downstream modules Vps2-Vps24 and Vps2-Did2-  
115 Ist1. Curvature preference and filament shape suggest that Vps60 polymers potentially form a  
116 membrane binding interface perpendicular to the helical axis like Snf7-Vps2-Vps24 and,  
117 presumably, Snf7 polymers<sup>52,69</sup> (Fig. 1 H). The higher curvature binding preference of later

118 subunits (Vps2-Vps24, Did2-Ist1) cohere with their binding interface parallel to the helical  
119 axis<sup>49,50,63,64</sup> (Fig. 1E).

120

### 121 **Spontaneous nucleation of Vps60 on membrane is highly efficient**

122 As both, Vps60 and Snf7, polymerize spontaneously on membrane, we next set out to  
123 compare their nucleation capacities. We therefore analyzed the nucleation rate of Atto565-  
124 Vps60 on SLBs (Fig. 2A-B). Below 50 nM, Atto565-Vps60 nucleation events increased  
125 linearly with respect to protein concentration, whereas above 50 nM, their number seemingly  
126 increased exponentially. In contrast to the estimated nucleation rate, which was likely  
127 underestimated due to overlapping Vps60 puncta, images at concentrations between 150 nM  
128 and 250 nM do not suggest a saturation of Vps60 binding. These results point towards Vps60  
129 displaying a higher intrinsic nucleation rate on membrane than Snf7, which, does not  
130 spontaneously nucleate below a concentration of 300 nM. Vps60 however does not form  
131 growing patches like Snf7, but instead binding manifests itself in accumulation of puncta (Fig.  
132 2C) as well as an overall increase of intensity on the membrane. Growth of Snf7 patches was  
133 previously explained by breaking of preexisting spirals into multiple smaller spirals from which  
134 protein polymerization could continue<sup>60</sup>. Filament breaking thus fuels a chain reaction from a  
135 single nucleation event, leading to expanding protein patches formed of hundreds of growing  
136 spirals. Observed filament structures of Vps60 (Fig. 1C) suggested that filament breaking  
137 might occur less frequently and that spiral growth was partially or completely inhibited,  
138 explaining why no growing Vps60-patches were observed (Fig. 2C).

139 Spontaneous nucleation rates for Snf7 (Fig. S2C-D)<sup>60,70,71</sup> can be increased by  
140 dedicated ESCRT-III nucleators, like Bro1 and the ESCRT-II-Vps20 complex<sup>26,65,72</sup>. As Vps60  
141 encompasses a Bro1-interaction domain and as its human homologue CHMP5 binds to the  
142 Bro1-domain containing protein Brox<sup>73</sup>, we wondered if Vps60 is targeted by these nucleators.  
143 Addition of Bro1 or ESCRT-II-Vps20 did not increase the Vps60 nucleation rate (Fig. 2D-E)  
144 nor the overall amount of protein recruited to membrane (Fig. S2A), indicating that Vps60 is  
145 not nucleated by these proteins. Vps60 could, however, interact with other ESCRT-III  
146 nucleators like Chm7<sup>36</sup> or have other, Vps60-specific nucleators. As Snf7 membrane  
147 recruitment is strongly inhibited by downstream ESCRT-III proteins<sup>68</sup>, we decided to also  
148 monitor Vps60 nucleation rates in presence of Vps2, Vps24, Did2, Ist1 and the ATPase Vps4.  
149 However, we did not observe any effect on Vps60's membrane binding regarding nor its  
150 nucleation rate (Fig. 2D-E) or its kinetics (Fig. S2B).

151

## 152 **Vps60 and Snf7 display mutually exclusive membrane binding patterns**

153 To next address if Vps60 and Snf7 interact upon each other's polymerization on  
154 membrane, we analyzed Vps60's nucleation on SLBs preincubated with Snf7, both  
155 simultaneously polymerizing and in absence of Snf7. This revealed Vps60 binding is  
156 unaffected by the presence of Snf7 (Fig. 3A-B, S3A-B). Similarly, Snf7 patches grew normally  
157 on SLBs preincubated with Vps60 (Fig. S3C). In fact, no colocalization of Snf7 and Vps60  
158 was observed, even when the whole membrane surface was covered, indicating that Vps60-  
159 and Snf7 membrane binding are mutually exclusive (Fig. 3C-D). Moreover, incubation of Snf7-  
160 patches with high concentrations of Vps60 resulted in a decrease in Snf7 intensity on the  
161 membrane and vice versa (Fig. S3D-G). This suggests Vps60 and Snf7 compete to bind on  
162 available membrane surface.

163 Following polymerization, Snf7 filaments recruit downstream subunits starting with  
164 Vps2-Vps24<sup>68</sup>, followed by Vps2-Did2 and finally Ist1<sup>41</sup>. As Vps60 and Snf7 polymers co-  
165 exist on membrane without observable interaction, we asked if Vp60 is recruited into Snf7-  
166 based polymers by downstream subunits. We saw no recruitment of Vps60 to Snf7 polymers  
167 nor in the presence of Vps2, Vps24, Did2 and Ist1 or when Snf7-patches were pre-incubated  
168 with all the downstream ESCRT-III subunits (Fig. 3E-F). Instead, Vps60 bound membrane  
169 identically in the absence or presence of any downstream subunits. Likewise, no integration of  
170 Vps60 into Snf7-polymers was seen upon Vps4-induced filament turn-over, even in the  
171 presence of downstream subunits (Fig. 3G-H, S3FG).

172 In summary, we find Vps60- and Snf7 polymers to co-exist independently on  
173 membranes, and no recruitment of Vps60 to Snf7-based polymers. Altogether, with its  
174 characteristics similar to Snf7, we wondered if Vps60 might function parallelly to Snf7 as an  
175 alternative initiating subunit for a multi-subunit ESCRT-III filament.

176

## 177 **Vps60 polymers recruit downstream ESCRT-III subunits**

178 To test our hypothesis, we studied the ESCRT-III subunit binding to SLBs pre-  
179 incubated with Vps60. Indeed, Alexa488-Vps2 was recruited strongly to Atto565-Vps60-  
180 covered SLBs in presence of Vps24 and Did2 (Fig. 4A-B). Similarly, we observe Vps60-  
181 mediated membrane binding of Alexa488-Vps24 in presence of Did2 and Vps2 (Fig. 4. C-D)  
182 and recruitment of Alexa488-Did2 when supplemented with Vps2 and Vps24 (Fig. 4 E, S4A).  
183 While Vps2-Vps24 are recruited to Snf7 polymers, Vps2-Vps24 was not sufficient for binding  
184 to Vps60-covered SLBs. Interestingly, we observed mild recruitment of Vps2-Did2 (Fig. 4A,  
185 E), indicating that Vps2-Did2 might act as major a recruitment complex in Vps60-based

186 polymers, taking over the role of Vps2-Vps24 in Snf7-based polymers<sup>62,68</sup>. Vps24, however  
187 greatly increased Vps2-Did2 binding efficiency to Vps60-covered membranes, indicating that  
188 Vps24 might promote Vps2-Did2 heterofilament formation. As Vps60 and Did2 are reported  
189 to interact with Vps4-cofactor Vta1<sup>58,59,74-77</sup>, we tested if Vta1 affects the recruitment of Vps2-  
190 Did2-Vps24 to Vps60, which, however was not the case (Fig. S4C-D). Overall, we do not  
191 observe strong colocalization of Vps2, Vps24 and Did2 with Vps60 puncta, but find that their  
192 binding is specifically enhanced in the presence of Vps60 puncta. As Vps60-filaments do not  
193 form patches, it may be that Vps60 serves as a nucleation template for ESCRT-III polymers  
194 which can then diffuse along membranes.

195 Alexa488-Ist1, analogous to the other ESCRT-III subunits, was specifically recruited  
196 to Vps60-covered vesicles in presence of Vps2, Vps24 and Did2 (Fig. 4E, S4B). For this  
197 experiment, we used GUVs instead of SLBs as Ist1 formed aggregates in solution which  
198 sedimented on the SLBs precluding the monitoring of Vps60-induced binding. Ist1 binding  
199 pattern mirrored Did2 recruitment, which is consistent with the previously reported Did2-Ist1  
200 heterodimer formation<sup>78</sup> and suggests Ist1 incorporation into ESCRT-III polymers to only rely  
201 on this interaction with Did2.

202 During Snf7-mediated recruitment of downstream subunits, distinct recruitment  
203 kinetics can be observed, we thus asked if a similar temporal organization can be seen for  
204 Vps60-induced membrane binding. Timelapse imaging of Vps60-covered SLBs incubated with  
205 Vps2, Vps24, Did2 and Ist1 revealed a synchronic increase of Vps2-, Vps24- and Did2  
206 intensity and a slightly delayed increase in Ist1 intensity (Fig. 4G). Overall, this result supports  
207 the notion of Vps2, Did2 and Vps24 together forming the initial recruitment complex (Fig.  
208 4H). Subsequently, membrane-bound Did2 then triggers binding of Ist1 to ESCRT-III  
209 polymers. Compared to Snf7-mediated recruitment of Vps2-Vps24, binding of downstream  
210 subunits is slower when initiated by Vps60. Indeed, recruitment kinetics of Vps2-Vps24-Did2  
211 to Vps60-filaments appears equivalent to Vps2-Did2 binding to Snf7-polymers<sup>41</sup> supporting  
212 the notion that in Vps60-mediated assemblies, the two initial waves of subunits (Vps2-Vps24,  
213 and then Vps2-Did2) are condensed into a single Vps2-Vps24-Did2 wave.

214

### 215 **Vps60-nucleated ESCRT-III polymers undergo Vps4-mediated turnover**

216 Previous studies demonstrated that ESCRT-III function in cells crucially depends on  
217 the ATPase activity of Vps4, which triggers filament turnover or remodeling<sup>68,79,80</sup>. To study if  
218 the Vps60-based polymers are likewise remodeled by Vps4, we performed timelapse imaging

219 of SLBs pre-incubated with Vps60, Vps2, Vp24, Did2. Upon addition of Ist1, Vps4 and ATP,  
220 Vps2 and Vps24 intensities decreased rapidly, indicating subunit disassembly (Fig. 5A). In  
221 contrast, Did2 and Ist1 remained stably bound to membranes when Ist1 was in excess, whereas  
222 Vps4-triggered disassembly occurs in absence of Ist1 (Fig. 5A, S5A-B). These results suggest  
223 that Did2 is protected from disassembly by competitive binding of Ist1, and Vps4 to Did2 (Fig.  
224 S5E), a mechanism that we previously proposed for Snf7-based filaments<sup>41</sup>. As bound Ist1  
225 itself undergoes continuous Vps4-triggered turnover, equilibrium between free Ist1 and Vps4  
226 probably determines if Did2 is disassembled or stabilized.

227 Importantly, Vps60, unlike Snf7, remained bound to the membrane upon incubation  
228 with Vps4/ATP or Ist1-Vps4/ATP (Fig. 5B). Moreover, neither supplementation with Vps4  
229 cofactor Vta1 nor Bro1, which were both suggested to interact with Vps60<sup>74,75</sup>, resulted in a  
230 disassembly of Vp60 from the membrane (Fig. 5B). Likewise, Vps60-polymers remained  
231 stable with a 10-fold increased Vps4 concentration, which may overcome a lower sensitivity  
232 of Vps60-filaments towards Vps4. No direct disassembly of Vps60 by Vps4 in the absence of  
233 any downstream ESCRT-III subunits was observed (data not shown).

234 While Vta1 did not promote Vps4-mediated Vps60 disassembly, it however affected  
235 the depolymerization of downstream subunits from Vps60-based polymers. Indeed, Vta1  
236 shifted Ist1's equilibrium from binding to disassembly (Fig. S5D, E), therefore perturbing Ist1-  
237 mediated protection of Did2 from Vps4-mediated disassembly (Fig. S5C, E). Additionally,  
238 Vps2 and Vps24 depolymerization rates increased (Fig. 5C-D). Intriguingly, in presence of  
239 Vta1, Vps2 and Vps24 depolymerization (Fig. 5 C-D) increased a lot more than Did2's  
240 disassembly did (Fig. 5E, S5C). Overall, these results suggest Vta1 potentially targets specific  
241 subunits to increase disassembly. Alternatively, Vta1-binding may primarily increase Vps4-  
242 activity, while differences between subunit disassembly rates may rely more on their  
243 accessibility to Vps4 within the polymer structure. While all three subunits display  
244 simultaneous and synchronic membrane recruitment, Vta1's strong influence on Vps2 and  
245 Vps24 depolymerization rates compared to Did2 establishes a depolymerization hierarchy  
246 between these three subunits. It is tempting to speculate that such Vta1-induced divergence of  
247 disassembly rates could promote the assembly of ESCRT-III subunits in a temporal sequence  
248 (Fig. 5F) as we have previously shown for Snf7-based polymers<sup>41</sup>.

249

250 **Vps60- and Snf7-based polymers exert varying and distinct dynamic properties**



251 Vps60 like Snf7 can recruit downstream subunits to form a heteropolymer. To test  
252 whether Snf7- and Vps60-polymers compete during subunit recruitment, we incubated  
253 Alexa488-Snf7- and Atto565-Vps60-covered SLBs with Atto647-Vps2, Vps24 and Did2 (Fig.  
254 6A). As a control, we incubated analogous SLBs with Vps2-Vps24, since it binds only to Snf7-  
255 patches and not to Vps60-covered membranes (Fig. 6B). Upon recruitment of Vps2-Did2-  
256 Vps24, Vps2 fluorescence initially colocalized with Snf7-patches followed by a slower binding  
257 to the Vps60-covered membrane (Fig.6A, C, D). In contrast, Vps2-Vps24 only colocalized  
258 with Snf7-patches but no recruitment to Vps60-covered membrane was observed (Fig. 6B-D).  
259 The two-stepped binding of Vps2-Did2-Vps24, likely emerges from an initial recruitment of  
260 Vps2-Vps24 to Snf7-patches. Thereafter, Vps2-Did2-Vp24 bind to Vps60-filaments by an  
261 independent recruitment process following slower kinetics (Fig. 3G), implying that recruitment  
262 to Snf7- or Vps60-filament occurs independently from each other. To similarly compare  
263 disassembly from Snf7 and Vps60 based ESCRT-III polymers, we monitored fluorescence of  
264 Vps2 upon addition of Vta1 and Vps4/ATP to SLBs pre-incubated with labeled-Vps2, Vps24,  
265 Did2 and Vps60 or Snf7, respectively (Fig. 6E). Vps2 depolymerization from Vps60-based  
266 polymers was slightly delayed compared to disassembly from Snf7-based filaments (Fig. 6E).

267 In conclusion, Vps60- and Snf7-based polymers assemble and undergo disassembly  
268 independently of each other. These results might indicate that both polymers can co-exist in  
269 cells in separated functions. In direct comparison, Vps60-based filaments display delayed  
270 assembly and disassembly kinetics which might indicate adaptation to cellular functions in  
271 which slower ESCRT-III assembly is required. Alternatively, we might miss cofactors in our  
272 in vitro reconstitution approach which could speed up the assembly and disassembly of Vps60-  
273 based polymers.

274

## 275 **Discussion**

276 We here show that the ESCRT-III subunit Vps60 functions as the basis for a novel  
277 multi-subunit ESCRT-III filament. We further propose this Vps60-based filament to  
278 potentially constitute the initiator of a second ESCRT-III polymerization sequence, alternative  
279 to the Snf7-based sequence we recently unraveled (Fig. 6F)<sup>41</sup>. In detail, we found Vps60 to  
280 polymerize into ring-shaped or curled filaments on membranes, which, in analogy to the Snf7-  
281 based polymerization sequence, then recruited ESCRT-III subunits Vps2, Vps24, Did2 and  
282 Ist1, before subsequently undergoing Vps4/Vta1-mediated filament turnover. Altogether, our  
283 results imply that Vps60, by acting as a template for initiating an alternative ESCRT-III

284 filament, could functionally “replace” Snf7 in specific ESCRT-III functions which require  
285 biochemical properties only Vps60-initiated polymers provide<sup>62,65,79,81</sup>.

286 In support of this notion, a recent study of ESCRT-III in *Plasmodium falciparum*  
287 infected red blood cells suggests that PfVps32 (Snf7 homologue) and PfVps60 function in two  
288 parallel pathways during formation of extracellular vesicles (EV)<sup>82</sup>. In contradiction to this  
289 idea, a very recent study in yeast suggests Vps60 to act downstream of Snf7, Vps2 and Vps24,  
290 as recruitment of Vps60 to endosomal membrane was distributed in Snf7, Vps2 and Vps24  
291 knockout mutants<sup>83</sup>. We here, however, find Snf7- and Vps60-polymers to co-exist  
292 independently on the same membrane *in vitro*. Additionally, in our assays, in coherence with  
293 Banjade *et al.*<sup>66</sup>, Vps60 polymerized spontaneously upon contact with membranes with a higher  
294 nucleation rate than Snf7 (this study). Spontaneous nucleation of all established downstream  
295 ESCRT-III subunit (Vps2, Vps24, Did2 and Ist1) was absent in our assay.

296 In contrast to Vps2-Vps24<sup>62,68</sup> which forms the minimal binding unit of Snf7 filaments,  
297 recruitment to Vps60 polymers was mediated by Vps2-Did2. This observation highlights the  
298 central and pivotal role of Vps2-Did2 during ESCRT-III activity, as already found in our  
299 previous study<sup>41</sup>. Overall, our observation of Vps2-Vps24-Did2 recruitment to Vps60 filament  
300 is strongly supported by a very recent analysis of ESCRT-III complexes isolated from yeast  
301 which reports interactions of Vps60 (Mos10) with Did2, Vps2 and Vps24<sup>83</sup>. Vps4-triggered  
302 filament remodeling has previously been established as one of the key factors of ESCRT-III  
303 activity in cells<sup>68,79,80</sup>. In our study, Vps60-based filaments were able to recruit Vps4 and  
304 underwent partial disassembly. Upon addition of the Vps4 activator Vta1, a disassembly  
305 hierarchy between the various subunits was established similarly to sequential  
306 depolymerization observed in Snf7-based filament<sup>41,68</sup>. In detail, Vps24 and Vps2 were  
307 depolymerized first, followed by Did2 and Ist1. This delay in Did2 disassembly could  
308 potentially be mediated by its direct interaction with Vta1<sup>58,59,74–77</sup>. Alternatively, by globally  
309 stimulating Vps4 activity, Vta1 might emphasize pre-existing biases in subunit susceptibility  
310 to Vps4 e.g., their accessibility within filaments. In stark contrast to Snf7-based polymers,  
311 Vps60 polymers are not disassembled in any of the conditions we tested. In cells, Vp60-based  
312 filaments might be targeted by another MIT-domain containing AAA-ATPase besides Vps4,  
313 or our *in vitro* reconstitution system might lack a crucial cofactor mediating interaction between  
314 Vps4 and Vps60.

315 Overall, the step-wise subunit recruitment and sequential depolymerization of Vps60-  
316 based polymers bares clear resemblance to the Snf7-based polymerization sequence we  
317 previously described<sup>41</sup>, and suggest the Vps60-based filament described in this study might

318 form the initiation of an alternative Vps60-based ESCRT-III polymerization sequence (Fig. 6  
319 F). Bioinformatic analysis of ESCRT-III proteins classes the subunits into two groups  
320 according to their domain conservation: the Snf7 family, Vps20, Snf7 and Vps60, groups  
321 clearly the nucleators and initiators of ESCRT-III (class I), and the Vps2 family encompassing  
322 Vps2, Vps24 and Did2 (class II), groups the "pivots" which recruit Vps4<sup>57</sup>. At a closer look,  
323 both Vps60-based and Snf7-based ESCRT-III polymers and their corresponding presumed  
324 polymerization sequences share remarkable similarities regarding their organization, indicating  
325 that ESCRT-III-mediated membrane remodeling might follow a general mechanism (Fig. 6F).  
326 An initial class I polymer (ring or spiral) mediates binding of class II subunits (helices) which  
327 then recruit an ATPase to trigger filament remodeling to promote ESCRT-III activity. In fact,  
328 this generalized progression of events is supported by the observation that direct recruitment  
329 of Vps4 via an initiating class I protein is non-functional *in vivo*<sup>66</sup>, potentially due to premature  
330 disassembly of the ESCRT-III polymer<sup>66</sup> or a lack of filament remodeling capacity<sup>55</sup>.

331 A remaining, yet essential question about the Vps60-based dynamic ESCRT-III  
332 polymers is their cellular function. Overall, the specific differences such as structure and  
333 kinetics between both ESCRT-III polymers and their associated sequences hint towards  
334 functional specialization of the filaments, adopting requirements of distinct cellular functions.  
335 This notion, is supported by a unique cellular localization of GFP-tagged Vps60 *in vivo* to not  
336 only the endosomal, as it is observed for Snf7, but also yeast's vacuolar membrane<sup>66,83</sup>.  
337 Separated functional pathways were also suggested for ESCRT-III subunits PfVps32 (Snf7  
338 homolog) and PfVps60 during EV-formation in *Plasmodium falciparum* infected red blood  
339 cells<sup>82</sup>. Finally, the author attributed the formation of smaller vesicles to the Vps60-dependent  
340 pathway which would agree with the smaller filament structures we observed.

341

342

### 343 **Acknowledgements**

344 A.R. acknowledges funding from the Swiss National Fund for Research Grants  
345 N°31003A\_130520, N°31003A\_149975 and N°31003A\_173087. The authors want to thank  
346 the NCCR Chemical Biology for constant support during this project.

347

348

349

350

351 **Authors contributions**

352 A.R. and A.-K.P. conceptualized the study. A.-K.P. and H.Z. designed, performed and  
353 analyzed experiments. H.Z. and F.H. purified proteins. A.-K.P. and A.R. wrote the manuscript  
354 with help from H.Z.

355

356

357

358

359 **Methods**

**Protein purification**

Vps60 (pGEX4T-Vps60) and Vta1 (pGEX4T-Vta1) (gift from David Katzmann lab, Mayo clinic, USA) were expressed for 4h in BI21 *e.coli* following IPTG induction. Bacteria were lysed (1% triton, 20 mM Hepes pH 8.0, 150 mM NaCl, cOmplete) using sonication and soluble lysate was loaded on GST-resin (washing buffer: 20 mM Hepes, pH 8.0, 150 NaCl), before on-column cleavage using TEV-protease was performed. Vta1-GST was eluted prior to TEV treatment as on-column digest was inefficient (elution buffer: 150 mM NaCl, 10 mM glutathione, 20 mM Hepes pH 8.0). TEV protease was removed using Ni-NTA resin and the purified protein of interest was dialyzed against storage buffer (20 mM Hepes, pH 8.0) before concentration.

Increase of Vps4 ATPase-activity upon addition of Vta1, was checked by malachite green assay at the end of each purification to confirm the proper functioning of Vta1. In short, a malachite green stock solution was prepared by mixing 3 parts of 0.045 % malachite green in water with 2 parts of 4.2% Ammonium Molybdate in 4 M HCl for 1 hour under constant stirring before supplementation with 0.01 % Tween20. For quantification a calorimetric measurement at 620nm was performed 5min after mixing of 3 parts malachite green stock solution with 1 part of reaction solution either resulting from incubation of Vps4 and Vta1 in reaction buffer (20 mM Hepes, 150 mM NaCl, 2mM MgCl<sub>2</sub> pH=7.5) supplemented with 1mM ATP or a phosphate calibration curve.

Following the labelling procedure given by the reagent provider, Snf7, Vps2, Ist1 and Vps24 were labeled with TFP-AlexaFluor-488 (Ref N°A-30005, ThermoFisher Scientific,). Vps2 and Vps60 were labeled with TFP-Atto-565 (Atto-Tec AD 565-3). Did2 was labeled with maleimide-AlexFluor-488 (ThermoFisher Scientific, A-30005). Vps2 was labeled with NHS-Atto-647N (Atto-Tec AD 647N). If not otherwise mentioned, following protein concentration were used: ESCRT-II 1µM, Vps20 1µM, Bro1 500nM, Vps60 50nM, Snf7 400nM, Vps2 1

$\mu\text{M}$ , Vps24 1  $\mu\text{M}$ , Did2 1  $\mu\text{M}$ , Ist1 1  $\mu\text{M}$ , Vps4 1  $\mu\text{M}$ , Vta1 500nM ATP 2 mM. In general, labeled proteins were mixed 1:1 with unlabeled protein.

### Preparation of giant unilamellar vesicles (GUV) and large giant unilamellar vesicles (LUV)

GUVs were prepared by electroformation: 20-30  $\mu\text{L}$  of a 2mg/ml lipid solution in chloroform (DOPC:DOPS:DOPE-Atto647N:DSPE-PEG(2000)Biotin, 6:4:0.01:0.003; Avanti Polar Lipids, Atto-tec) were dried on indium-tin oxide (ITO)-coated glass slides for 1h. For experiments including Atto647N-Vps2 unlabeled GUVs were used. A growth chamber was assembled by clamping a rubber ring between the ITO-slides, filled with 500  $\mu\text{l}$  of a sucrose buffer osmotically equilibrated with the experimental buffer. ITO-Slides were then connected to an AC generator set under 1V AC (10 Hz) for 1.5h. GUVs were stored at 4°C for at maximum a week.

For LUV preparation, DOPC:DOPS (6:4; 10 mg/ml) mixture was evaporated in a glass tube, 500  $\mu\text{l}$  of buffer were added, the tube was vortex followed by 5 times freezing and thawing. LUVs were stored at -20 °C and extruded with a 200 nm filter before usage.

### Supported membrane bilayer assay

Supported membrane bilayer assay was performed as described in <sup>46</sup>. Experiments were performed in 20 mM Tris pH.6.8, 200 mM NaCl and 1mM  $\text{MgCl}_2$ . 2 mM DTT was added to the buffer for experiments including Ist1. GUVs diluted in buffer were burst on a plasma-cleaned coverslip forming the bottom of a flow chamber (coverslip and sticky-Slide VI 0.4, Ibidi) to form supported bilayers. Thereafter, the chamber was passivated with Casein (1mg/ml Sigma -Aldrich) for 10 min and washed with buffer, before the experiments was conducted. Subsequent changes of protein or buffer solutions in the chamber were made via a syringe pump connected to the flow chamber. Briefly, protein preparations are diluted in reaction buffer with 80  $\mu\text{L}$  final volume. In presence of Ist and Did2, 0.8  $\mu\text{L}$  DTT 1 mM is added. And reaction buffer has 2 mM  $\text{MgCl}_2$  added. All proteins have a final concentration of 1  $\mu\text{M}$  during acquisitions except Vps60 and Snf7. Snf7 patches are pre-grown at 400 nM until, then Snf7 is washed out before other protein is added. Vps60 was tested with many concentrations for dynamics assays and added at 50 nM for 9 minutes when pre-grown for experiments.

Partially adhered vesicles were prepared as described in <sup>46</sup>. Briefly, a flow chamber assembled from a coverslip and sticky-Slide VI 0.4, Ibidi was incubated with Avidin (0.1 mg/ml) for 10 min, before washing with buffer (20 mM Tris pH.6.8, 200 mM NaCl and 1mM

MgCl<sub>2</sub>) and addition of GUVs (including 0.03 % DSPE-PEG(2000)Biotin) diluted in buffer. As soon as GUVs started to attach biotinylated-Albumin (1mg/ml, Sigma-Aldrich) was added to stop attachment and prevent bursting of the GUVs.

### Image acquisition

Confocal Imaging was performed on an inverted spinning disc microscope assembled by 3i (Intelligent Imaging Innovation) consisting of a Nikon base (Eclipse C1, Nikon), a 100x 1.49 NA oil immersion objective and an EVOLVE EM-CCD camera (Roper Scientific Inc.). For analysis of supported bilayer experiments, 3 μm thick Z-stack were maximally projected using a Fiji plugin<sup>84</sup>. X-y drift of the microscopy was corrected using the plugin Turboreg and a custom-written ImageJ macro. For artificial membrane neck experiments, 15 μm thick Z-stacks were acquired.

### Electron microscopy

For EM experiments, LUVs were diluted 1:100 in buffer (20 mM Tris pH.6.8, 200 mM NaCl and 1mM MgCl<sub>2</sub>), spun down (10<sup>5</sup>, 5,000g), resuspended in 250 nM Vps60 for 1h at 4°C. Samples were absorbed onto Carbon-coated grids Cu 300 and stained with 2% uranyl acetate for 30s. Images were acquired on a Tecnai G2 Sphera (FEI) electron microscope.

### Optical tweezer tube pulling experiment

Membrane nanotube pulling experiments were performed on the setup published in<sup>46</sup> allowing simultaneous optical tweezer application, spinning disc confocal and brightfield imaging based on an inverted Nikon eclipse Ti microscope and a 5W 1064nm laser focused through a 100 x 1.3 NA oil objective (ML5-CW-P-TKS-OTS, Manlight). Membrane nanotubes were pulled with streptavidin beads (3.05 μm, Spherotec) from a GUV containing 0.01% DSPE-PEG(2000)Biotin and aspirated in a motorized micropipette (MP-285, Sutter Instrument). Proteins were injected using a slightly bigger micropipette connected to a pressure control system (MFCS-VAC -69 mbar, Fluigent).

### Quantification and statistical analysis

For quantification of supported bilayer experiments, integrated fluorescence intensity of membrane patches (Vps60) of single proteins patches (Snf7) was measured using Fiji, background at time 0 min subtracted, normalized to time point 0 and a kymograph was extracted for dynamic experiments. Fluorescence intensities were normalized by their

maximum value. To determine the colocalization of Atto565-Vps60 and Alexa488-Snf7 or Atto647-Vps2 and Atto565-Vps60 or Alexa488-Snf7, relative fluorescence was measured along linearized membrane contours, relative fluorescence values were binarized (1 above threshold, 0 below, thresholds: 0.3 Snf7, 0.4 DOPE). The percentage of no colocalization was extracted by the proportion of pixels with the value 1 from the Snf7 channel for which the value in the membrane channel was 0. No colocalization was only counted at a minimal distance of four pixels to the nearest membrane neck (value 1).

For quantification of nucleation rates, membrane areas were isolated from images and Vps60-puncta or total fluorescence of Vps60 after background subtraction ( $t = 0\text{min}$ ) was extracted and divided through total membrane area.

For all experiments the mean and standard deviation (SD) were calculated. Number of independent experiments (n) and number of patches or membrane necks (ROI) analyzed are indicated in the corresponding figure legends. The graph and statistics were done using Prism 8 (GraphPad software).

360

361

362 **References**

- 363 1. Spang, A. *et al.* Complex archaea that bridge the gap between prokaryotes and  
364 eukaryotes. *Nature* **521**, 173–179 (2015).
- 365 2. Liu, J. *et al.* Bacterial Vipp1 and PspA are members of the ancient ESCRT-III  
366 membrane-remodeling superfamily. *Cell* (2021) doi:10.1016/j.cell.2021.05.041.
- 367 3. Schöneberg, J., Lee, I.-H., Iwasa, J. H. & Hurley, J. H. Reverse-topology membrane  
368 scission by the ESCRT proteins. *Nat. Rev. Mol. Cell Biol.* **18**, 5–17 (2017).
- 369 4. Gatta, A. T. & Carlton, J. G. The ESCRT-machinery: closing holes and expanding roles.  
370 *Curr Opin Cell Biol* **59**, 121–132 (2019).
- 371 5. Vietri, M., Radulovic, M. & Stenmark, H. The many functions of ESCRTs. *Nat Rev Mol*  
372 *Cell Biol* **21**, 25–42 (2020).
- 373 6. Barnes, J. & Wilson, D. W. Seeking Closure: How Do Herpesviruses Recruit the Cellular  
374 ESCRT Apparatus? *J. Virol.* **93**, (2019).
- 375 7. Broniarczyk, J. *et al.* The VPS4 component of the ESCRT machinery plays an essential  
376 role in HPV infectious entry and capsid disassembly. *Sci Rep* **7**, 45159 (2017).
- 377 8. Lippincott-Schwartz, J., Freed, E. O. & van Engelenburg, S. B. A Consensus View of  
378 ESCRT-Mediated Human Immunodeficiency Virus Type 1 Abscission. *Annu Rev Virol*  
379 **4**, 309–325 (2017).
- 380 9. Ortmann, A. C. *et al.* Transcriptome analysis of infection of the archaeon *Sulfolobus*  
381 *solfataricus* with *Sulfolobus* turreted icosahedral virus. *J. Virol.* **82**, 4874–4883 (2008).
- 382 10. Streck, N. T., Carmichael, J. & Buchkovich, N. J. Nonenvelopment Role for the ESCRT-  
383 III Complex during Human Cytomegalovirus Infection. *J. Virol.* **92**, (2018).
- 384 11. Tabata, K. *et al.* Unique Requirement for ESCRT Factors in Flavivirus Particle  
385 Formation on the Endoplasmic Reticulum. *Cell Rep* **16**, 2339–2347 (2016).



- 386 12. Denais, C. M. *et al.* Nuclear envelope rupture and repair during cancer cell migration.  
387 *Science* **352**, 353–358 (2016).
- 388 13. Jimenez, A. J. *et al.* ESCRT machinery is required for plasma membrane repair. *Science*  
389 **343**, 1247136 (2014).
- 390 14. Raab, M. *et al.* ESCRT III repairs nuclear envelope ruptures during cell migration to limit  
391 DNA damage and cell death. *Science* **352**, 359–362 (2016).
- 392 15. Radulovic, M. *et al.* ESCRT-mediated lysosome repair precedes lysophagy and promotes  
393 cell survival. *EMBO J.* **37**, (2018).
- 394 16. Skowyra, M. L., Schlesinger, P. H., Naismith, T. V. & Hanson, P. I. Triggered  
395 recruitment of ESCRT machinery promotes endolysosomal repair. *Science* **360**, (2018).
- 396 17. Junglas, B. *et al.* PspA adopts an ESCRT-III-like fold and remodels bacterial membranes.  
397 *Cell* (2021) doi:10.1016/j.cell.2021.05.042.
- 398 18. Gupta, T. K. *et al.* Structural basis for VIPP1 oligomerization and maintenance of  
399 thylakoid membrane integrity. *Cell* (2021) doi:10.1016/j.cell.2021.05.011.
- 400 19. Göser, V., Kehl, A., Röder, J. & Hensel, M. Role of the ESCRT-III complex in  
401 controlling integrity of the Salmonella-containing vacuole. *Cell. Microbiol.* e13176  
402 (2020) doi:10.1111/cmi.13176.
- 403 20. López-Jiménez, A. T. *et al.* The ESCRT and autophagy machineries cooperate to repair  
404 ESX-1-dependent damage at the Mycobacterium-containing vacuole but have opposite  
405 impact on containing the infection. *PLoS Pathog.* **14**, e1007501 (2018).
- 406 21. Allison, R. *et al.* An ESCRT-spastin interaction promotes fission of recycling tubules  
407 from the endosome. *J. Cell Biol.* **202**, 527–543 (2013).
- 408 22. Chang, C.-L. *et al.* Spastin tethers lipid droplets to peroxisomes and directs fatty acid  
409 trafficking through ESCRT-III. *J. Cell Biol.* (2019) doi:10.1083/jcb.201902061.

- 410 23. Mast, F. D. *et al.* ESCRT-III is required for scissioning new peroxisomes from the  
411 endoplasmic reticulum. *J. Cell Biol.* **217**, 2087–2102 (2018).
- 412 24. Dores, M. R., Grimsey, N. J., Mendez, F. & Trejo, J. ALIX Regulates the Ubiquitin-  
413 Independent Lysosomal Sorting of the P2Y1 Purinergic Receptor via a YPX3L Motif.  
414 *PLoS One* **11**, e0157587 (2016).
- 415 25. Dores, M. R. *et al.* AP-3 regulates PAR1 ubiquitin-independent MVB/lysosomal sorting  
416 via an ALIX-mediated pathway. *Mol Biol Cell* **23**, 3612–3623 (2012).
- 417 26. Pashkova, N. *et al.* The yeast Alix homolog Bro1 functions as a ubiquitin receptor for  
418 protein sorting into multivesicular endosomes. *Dev Cell* **25**, 520–533 (2013).
- 419 27. Olmos, Y., Perdrix-Rosell, A. & Carlton, J. G. Membrane Binding by CHMP7  
420 Coordinates ESCRT-III-Dependent Nuclear Envelope Reformation. *Curr Biol* **26**, 2635–  
421 2641 (2016).
- 422 28. Vietri, M. *et al.* Spastin and ESCRT-III coordinate mitotic spindle disassembly and  
423 nuclear envelope sealing. *Nature* **522**, 231–235 (2015).
- 424 29. Webster, B. M. *et al.* Chm7 and Heh1 collaborate to link nuclear pore complex quality  
425 control with nuclear envelope sealing. *EMBO J* **35**, 2447–2467 (2016).
- 426 30. Babst, M., Katzmann, D. J., Estepa-Sabal, E. J., Meerloo, T. & Emr, S. D. Escrt-III: an  
427 endosome-associated heterooligomeric protein complex required for mvb sorting. *Dev.*  
428 *Cell* **3**, 271–282 (2002).
- 429 31. Teis, D., Saksena, S. & Emr, S. D. Ordered assembly of the ESCRT-III complex on  
430 endosomes is required to sequester cargo during MVB formation. *Dev. Cell* **15**, 578–589  
431 (2008).
- 432 32. Teis, D., Saksena, S., Judson, B. L. & Emr, S. D. ESCRT-II coordinates the assembly of  
433 ESCRT-III filaments for cargo sorting and multivesicular body vesicle formation. *EMBO*  
434 *J.* **29**, 871–883 (2010).

- 435 33. Saksena, S., Wahlman, J., Teis, D., Johnson, A. E. & Emr, S. D. Functional reconstitution  
436 of ESCRT-III assembly and disassembly. *Cell* **136**, 97–109 (2009).
- 437 34. Obita, T. *et al.* Structural basis for selective recognition of ESCRT-III by the AAA  
438 ATPase Vps4. *Nature* **449**, 735–739 (2007).
- 439 35. Stuchell-Breton, M. D. *et al.* ESCRT-III recognition by VPS4 ATPases. *Nature* **449**,  
440 740–744 (2007).
- 441 36. Brune, T., Kunze-Schumacher, H. & Kölling, R. Interactions in the ESCRT-III network  
442 of the yeast *Saccharomyces cerevisiae*. *Curr Genet* **65**, 607–619 (2019).
- 443 37. Lata, S. *et al.* Helical structures of ESCRT-III are disassembled by VPS4. *Science* **321**,  
444 1354–1357 (2008).
- 445 38. Adell, M. A. Y. *et al.* Coordinated binding of Vps4 to ESCRT-III drives membrane neck  
446 constriction during MVB vesicle formation. *J. Cell Biol.* **205**, 33–49 (2014).
- 447 39. Yang, B., Stjepanovic, G., Shen, Q., Martin, A. & Hurley, J. H. Vps4 disassembles an  
448 ESCRT-III filament by global unfolding and processive translocation. *Nat. Struct. Mol.*  
449 *Biol.* **22**, 492–498 (2015).
- 450 40. Mierzwa, B. E. *et al.* Dynamic subunit turnover in ESCRT-III assemblies is regulated by  
451 Vps4 to mediate membrane remodelling during cytokinesis. *Nat. Cell Biol.* **19**, 787–798  
452 (2017).
- 453 41. Pfitzner, A.-K. *et al.* An ESCRT-III Polymerization Sequence Drives Membrane  
454 Deformation and Fission. *Cell* **182**, 1140–1155.e18 (2020).
- 455 42. Guizetti, J. *et al.* Cortical constriction during abscission involves helices of ESCRT-III-  
456 dependent filaments. *Science* **331**, 1616–1620 (2011).
- 457 43. Adell, M. A. Y. *et al.* Recruitment dynamics of ESCRT-III and Vps4 to endosomes and  
458 implications for reverse membrane budding. *Elife* **6**, (2017).

- 459 44. Henne, W. M., Buchkovich, N. J., Zhao, Y. & Emr, S. D. The endosomal sorting  
460 complex ESCRT-II mediates the assembly and architecture of ESCRT-III helices. *Cell*  
461 **151**, 356–371 (2012).
- 462 45. Shen, Q.-T. *et al.* Structural analysis and modeling reveals new mechanisms governing  
463 ESCRT-III spiral filament assembly. *J. Cell Biol.* **206**, 763–777 (2014).
- 464 46. Chiaruttini, N. *et al.* Relaxation of Loaded ESCRT-III Spiral Springs Drives Membrane  
465 Deformation. *Cell* **163**, 866–879 (2015).
- 466 47. Hanson, P. I., Roth, R., Lin, Y. & Heuser, J. E. Plasma membrane deformation by  
467 circular arrays of ESCRT-III protein filaments. *J. Cell Biol.* **180**, 389–402 (2008).
- 468 48. Effantin, G. *et al.* ESCRT-III CHMP2A and CHMP3 form variable helical polymers in  
469 vitro and act synergistically during HIV-1 budding. *Cell. Microbiol.* **15**, 213–226 (2013).
- 470 49. Nguyen, H. C. *et al.* Membrane constriction and thinning by sequential ESCRT-III  
471 polymerization. *Nat Struct Mol Biol* **27**, 392–399 (2020).
- 472 50. McCullough, J. *et al.* Structure and membrane remodeling activity of ESCRT-III helical  
473 polymers. *Science* **350**, 1548–1551 (2015).
- 474 51. Hanson, P. I., Roth, R., Lin, Y. & Heuser, J. E. Plasma membrane deformation by  
475 circular arrays of ESCRT-III protein filaments. *J Cell Biol* **180**, 389–402 (2008).
- 476 52. Moser von Filseck, J. *et al.* Anisotropic ESCRT-III architecture governs helical  
477 membrane tube formation. *Nat Commun* **11**, 1516 (2020).
- 478 53. Bertin, A. *et al.* Human ESCRT-III polymers assemble on positively curved membranes  
479 and induce helical membrane tube formation. *Nat Commun* **11**, 2663 (2020).
- 480 54. Harker-Kirschneck, L. *et al.* Physical mechanisms of ESCRT-III-driven cell division.  
481 *Proc Natl Acad Sci U S A* **119**, e2107763119 (2022).

- 482 55. Pfitzner, A.-K., Moser von Filseck, J. & Roux, A. Principles of membrane remodeling by  
483 dynamic ESCRT-III polymers. *Trends in Cell Biology* (2021)  
484 doi:10.1016/j.tcb.2021.04.005.
- 485 56. Katzmann, D. J., Babst, M. & Emr, S. D. Ubiquitin-dependent sorting into the  
486 multivesicular body pathway requires the function of a conserved endosomal protein  
487 sorting complex, ESCRT-I. *Cell* **106**, 145–155 (2001).
- 488 57. Leung, K. F., Dacks, J. B. & Field, M. C. Evolution of the multivesicular body ESCRT  
489 machinery; retention across the eukaryotic lineage. *Traffic* **9**, 1698–1716 (2008).
- 490 58. Nickerson, D. P., West, M., Henry, R. & Odorizzi, G. Regulators of Vps4 ATPase  
491 activity at endosomes differentially influence the size and rate of formation of  
492 intraluminal vesicles. *Mol Biol Cell* **21**, 1023–1032 (2010).
- 493 59. Azmi, I. F. *et al.* ESCRT-III family members stimulate Vps4 ATPase activity directly or  
494 via Vta1. *Dev Cell* **14**, 50–61 (2008).
- 495 60. Chiaruttini, N. *et al.* Relaxation of Loaded ESCRT-III Spiral Springs Drives Membrane  
496 Deformation. *Cell* **163**, 866–879 (2015).
- 497 61. De Franceschi, N. *et al.* The ESCRT protein CHMP2B acts as a diffusion barrier on  
498 reconstituted membrane necks. *J Cell Sci* **132**, (2018).
- 499 62. Teis, D., Saksena, S. & Emr, S. D. Ordered assembly of the ESCRT-III complex on  
500 endosomes is required to sequester cargo during MVB formation. *Dev Cell* **15**, 578–589  
501 (2008).
- 502 63. Lata, S. *et al.* Structural basis for autoinhibition of ESCRT-III CHMP3. *J Mol Biol* **378**,  
503 818–827 (2008).
- 504 64. Effantin, G. *et al.* ESCRT-III CHMP2A and CHMP3 form variable helical polymers in  
505 vitro and act synergistically during HIV-1 budding. *Cell Microbiol* **15**, 213–226 (2013).

- 506 65. Henne, W. M., Buchkovich, N. J., Zhao, Y. & Emr, S. D. The endosomal sorting  
507 complex ESCRT-II mediates the assembly and architecture of ESCRT-III helices. *Cell*  
508 **151**, 356–371 (2012).
- 509 66. Banjade, S., Shah, Y. H., Tang, S. & Emr, S. D. Design principles of the ESCRT-III  
510 Vps24-Vps2 module. *Elife* **10**, (2021).
- 511 67. Lenz, M., Crow, D. J. G. & Joanny, J.-F. Membrane buckling induced by curved  
512 filaments. *Phys Rev Lett* **103**, 038101 (2009).
- 513 68. Mierzwa, B. E. *et al.* Dynamic subunit turnover in ESCRT-III assemblies is regulated by  
514 Vps4 to mediate membrane remodelling during cytokinesis. *Nat Cell Biol* **19**, 787–798  
515 (2017).
- 516 69. Tang, S. *et al.* ESCRT-III activation by parallel action of ESCRT-I/II and ESCRT-0/Bro1  
517 during MVB biogenesis. *Elife* **5**, (2016).
- 518 70. Fyfe, I., Schuh, A. L., Edwardson, J. M. & Audhya, A. Association of the endosomal  
519 sorting complex ESCRT-II with the Vps20 subunit of ESCRT-III generates a curvature-  
520 sensitive complex capable of nucleating ESCRT-III filaments. *J Biol Chem* **286**, 34262–  
521 34270 (2011).
- 522 71. Larios, J., Mercier, V., Roux, A. & Gruenberg, J. ALIX- and ESCRT-III-dependent  
523 sorting of tetraspanins to exosomes. *J Cell Biol* **219**, (2020).
- 524 72. Teis, D., Saksena, S., Judson, B. L. & Emr, S. D. ESCRT-II coordinates the assembly of  
525 ESCRT-III filaments for cargo sorting and multivesicular body vesicle formation. *EMBO*  
526 *J* **29**, 871–883 (2010).
- 527 73. Mu, R. *et al.* Two distinct binding modes define the interaction of Brox with the C-  
528 terminal tails of CHMP5 and CHMP4B. *Structure* **20**, 887–898 (2012).

- 529 74. Yang, Z. *et al.* Structural basis of molecular recognition between ESCRT-III-like protein  
530 Vps60 and AAA-ATPase regulator Vta1 in the multivesicular body pathway. *J Biol*  
531 *Chem* **287**, 43899–43908 (2012).
- 532 75. Shen, J. *et al.* NMR studies on the interactions between yeast Vta1 and Did2 during the  
533 multivesicular bodies sorting pathway. *Sci Rep* **6**, 38710 (2016).
- 534 76. Monroe, N., Han, H., Shen, P. S., Sundquist, W. I. & Hill, C. P. Structural basis of  
535 protein translocation by the Vps4-Vta1 AAA ATPase. *Elife* **6**, (2017).
- 536 77. Norgan, A. P. *et al.* Relief of autoinhibition enhances Vta1 activation of Vps4 via the  
537 Vps4 stimulatory element. *J Biol Chem* **288**, 26147–26156 (2013).
- 538 78. Rue, S. M., Mattei, S., Saksena, S. & Emr, S. D. Novel Ist1-Did2 complex functions at a  
539 late step in multivesicular body sorting. *Mol Biol Cell* **19**, 475–484 (2008).
- 540 79. Adell, M. A. Y. *et al.* Recruitment dynamics of ESCRT-III and Vps4 to endosomes and  
541 implications for reverse membrane budding. *Elife* **6**, (2017).
- 542 80. Guizetti, J. *et al.* Cortical constriction during abscission involves helices of ESCRT-III-  
543 dependent filaments. *Science* **331**, 1616–1620 (2011).
- 544 81. Babst, M., Katzmann, D. J., Estepa-Sabal, E. J., Meerloo, T. & Emr, S. D. Escrt-III: an  
545 endosome-associated heterooligomeric protein complex required for mvb sorting. *Dev*  
546 *Cell* **3**, 271–282 (2002).
- 547 82. Avalos-Padilla, Y. *et al.* The ESCRT-III machinery participates in the production of  
548 extracellular vesicles and protein export during Plasmodium falciparum infection. *PLOS*  
549 *Pathogens* **17**, e1009455 (2021).
- 550 83. Alsleben, S. & Kölling, R. *Vps68 cooperates with ESCRT-III in intraluminal vesicle*  
551 *formation*. 2022.01.03.474785  
552 <https://www.biorxiv.org/content/10.1101/2022.01.03.474785v1> (2022)  
553 doi:10.1101/2022.01.03.474785.

554 84. Aguet, F., Van De Ville, D. & Unser, M. Model-based 2.5-d deconvolution for extended  
555 depth of field in brightfield microscopy. *IEEE Trans Image Process* **17**, 1144–1153  
556 (2008).  
557  
558



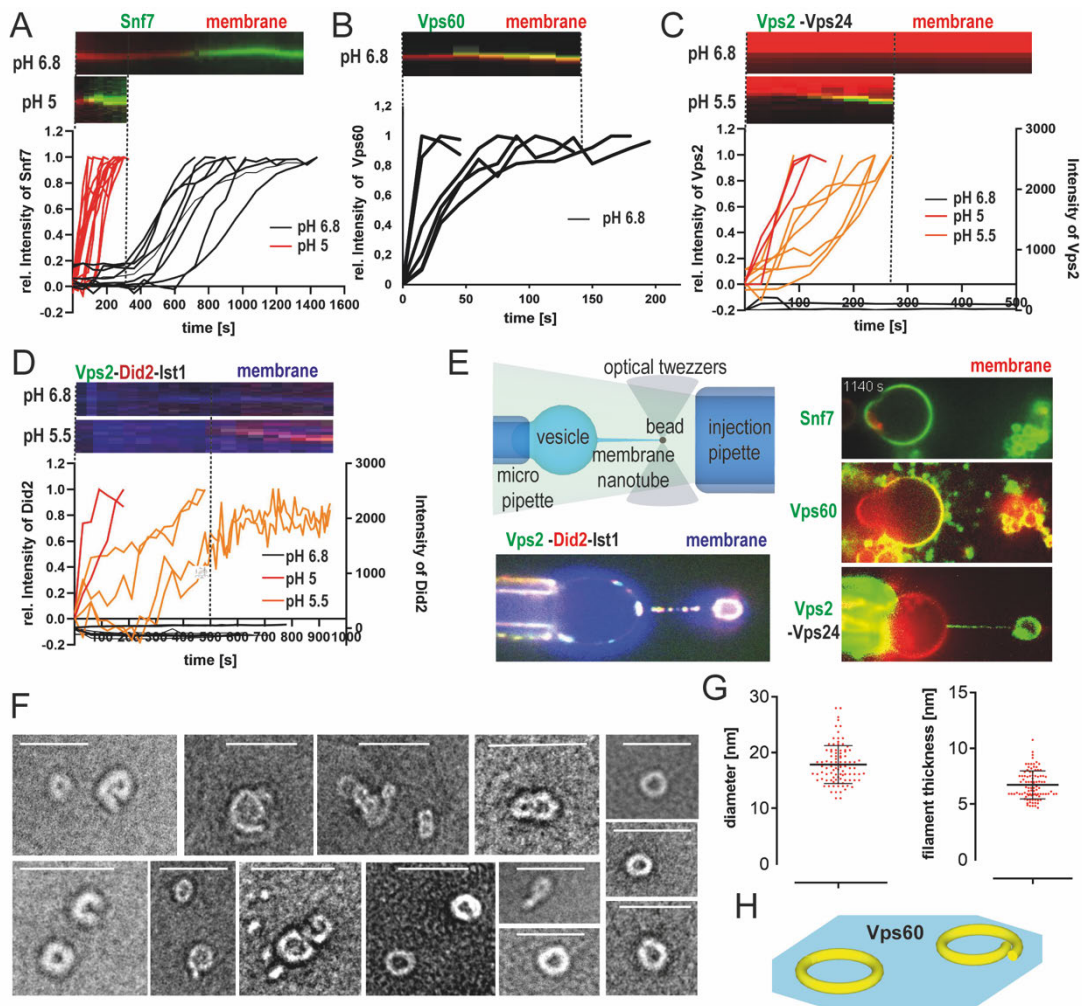

559

560 **Figure 1. Comparison of biochemical properties of ESCRT-III proteins.**

561 A-D. Quantification and kymographs of dynamics of Snf7 (A), Vps60 (B), Vps2-Vps24 (C) or Vps2-  
 562 Did2-Ist1 (D) binding to membrane at indicated pH. E. Schematic representation of membrane nanotube  
 563 pulling and confocal microscopy images of Snf7-Alex488 (green), Vps60 (green), Vps2-Alex488  
 564 (green) and Vps24 or Vps2-Alex488 (green) and Did2-Atto565 (red) and Ist1 binding to membrane  
 565 nanotubes (red, blue). F. Negative stain electron micrographs of Vps60 filaments polymerized on LUVs  
 566 (scale bar: 100nm). G. quantification of experiment described in F. H. Schematic representation of  
 567 Vps60 filaments.

568

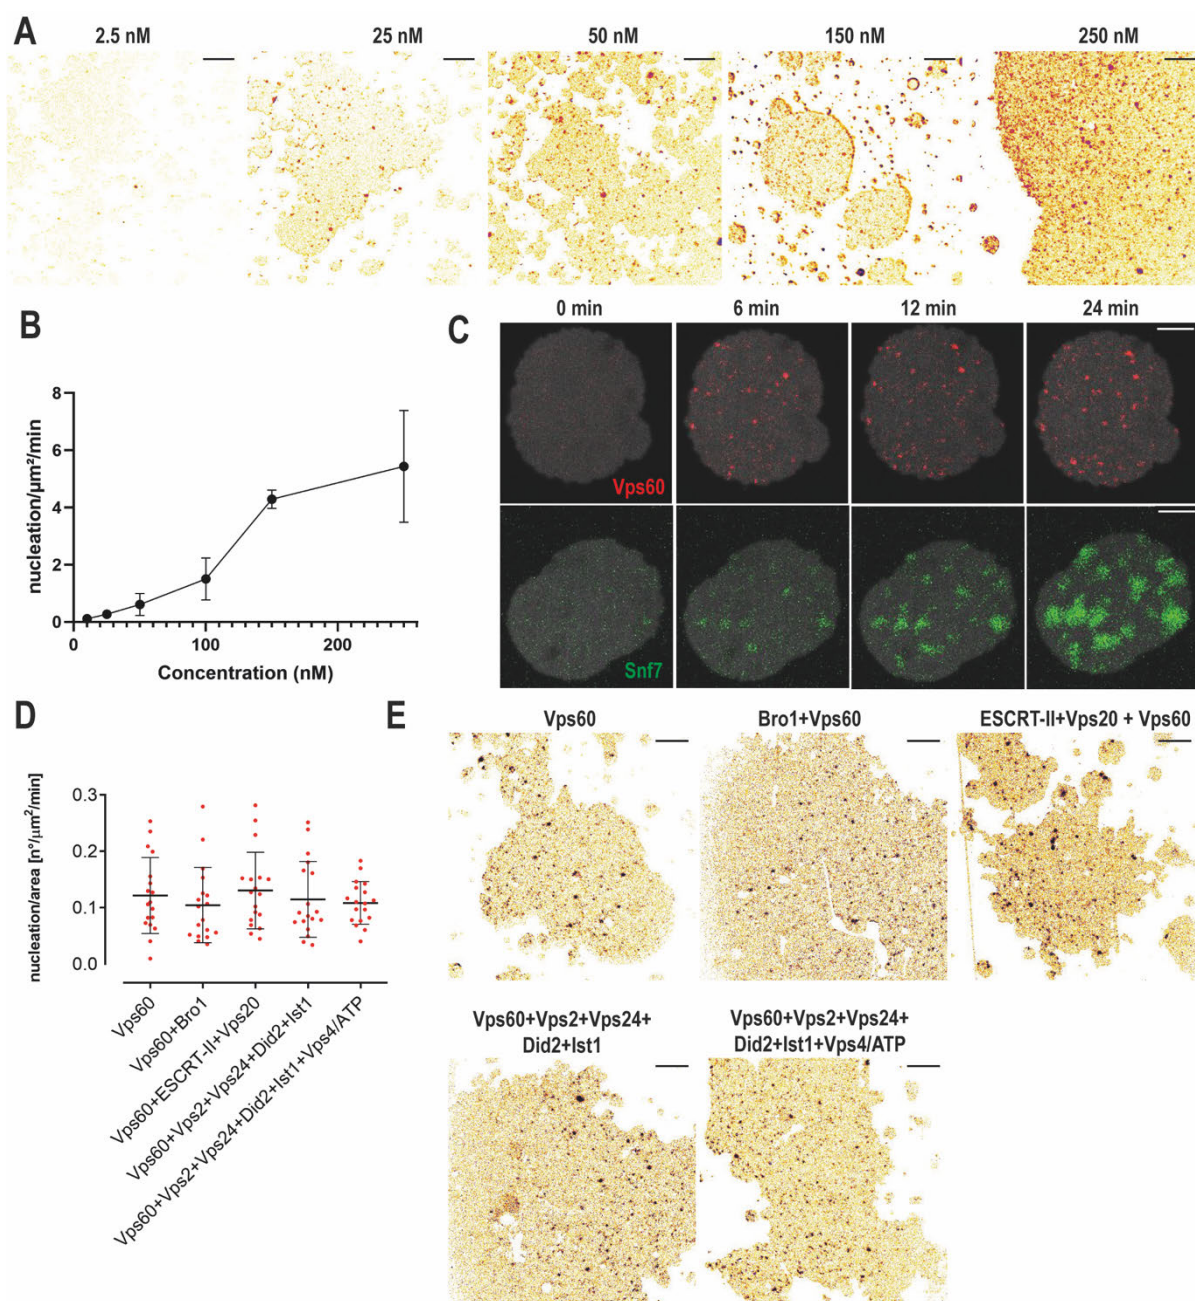

569

570 **Figure 2. Nucleation properties of Vps60 polymerization on membrane.**

571 A. Confocal images of SLBs incubated with indicated concentration of Vps60 (scale bar 10 μm). B.  
 572 Quantification of experiment described in A. C. Timelapse experiments of SLBs (gray) incubated with  
 573 Vps60 (red, upper panel) or Snf7 (green, lower panel). D, E. Quantification (D) and confocal images  
 574 (E) of SLBs incubated with Vps60 and the indicated proteins

575

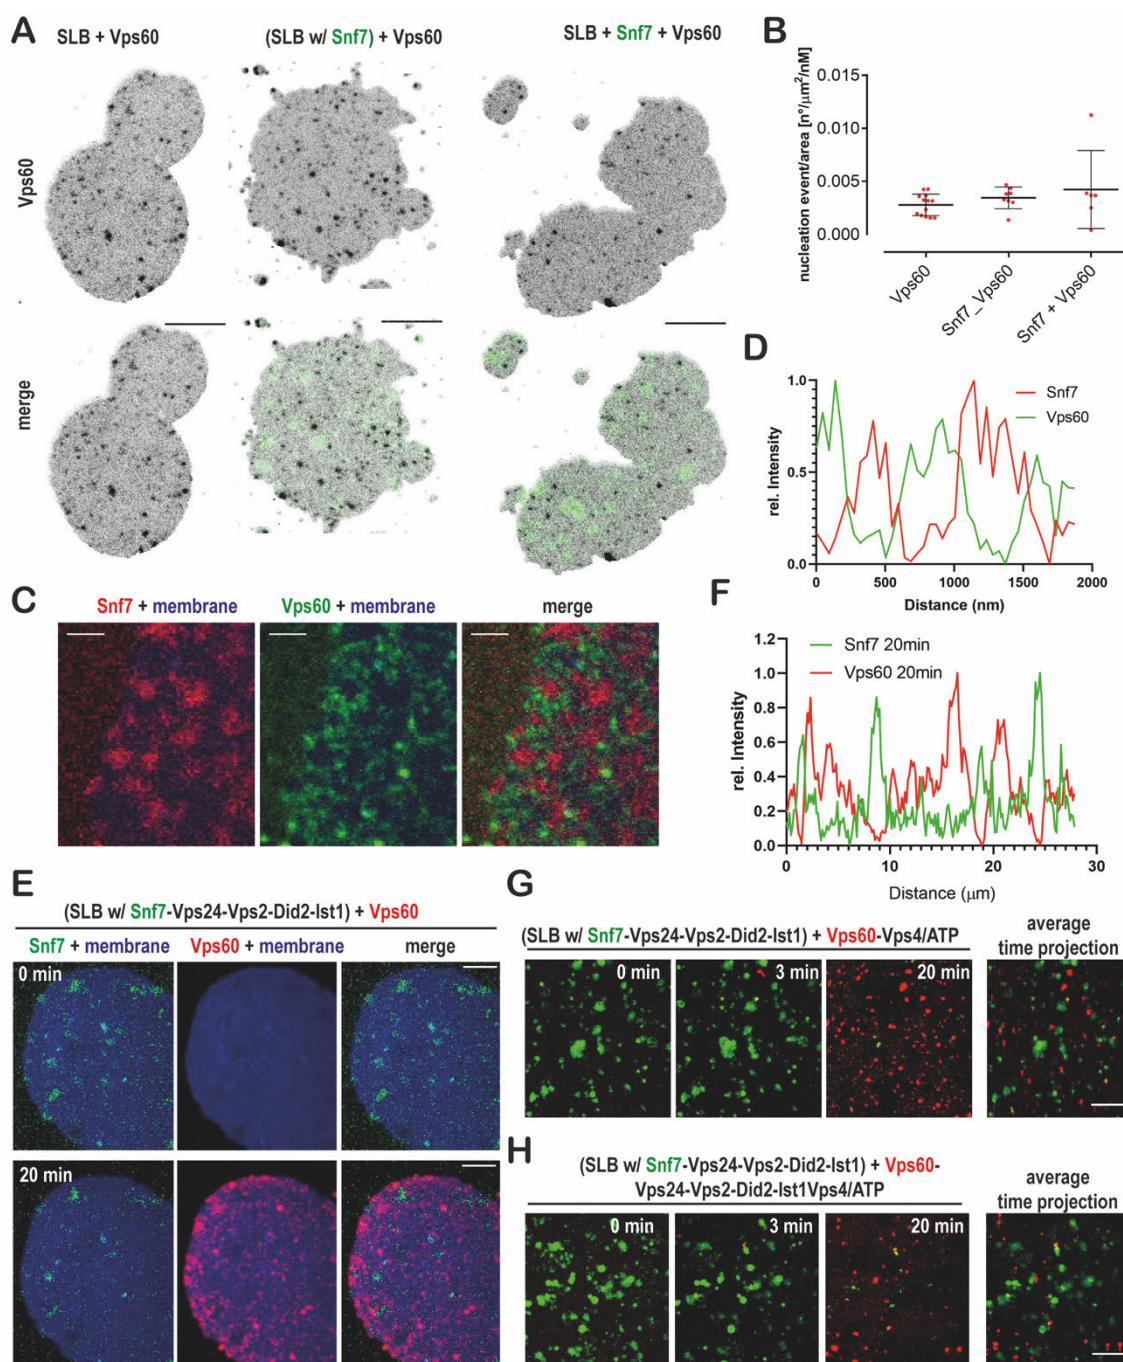

576

577 **Figure 3. Vps60 and Snf7 bind membrane mutually exclusively.**

578 A. Confocal images of SLBs incubated with Vps60 (black) and Snf7 (green) where indicated (scale bar  
 579 10  $\mu\text{m}$ ). B. Quantification of experiments described in A. C. Confocal images of SLBs (blue) incubated  
 580 with Snf7 (red) and Vps60 (green) (scale bar 2  $\mu\text{m}$ ). D. Plot of fluorescence profile of an exemplary  
 581 membrane section from experiments described in C. D. Confocal images of timelapse experiment of  
 582 addition of Vps60 (red) to SLBs (blue) pre-incubated with Snf7 (green), Vps2, Vps24, Did2 and Ist1.  
 583 F. Plot of fluorescence profile of an exemplary membrane section ( $t = 20$  min) from experiments  
 584 described in F.

585

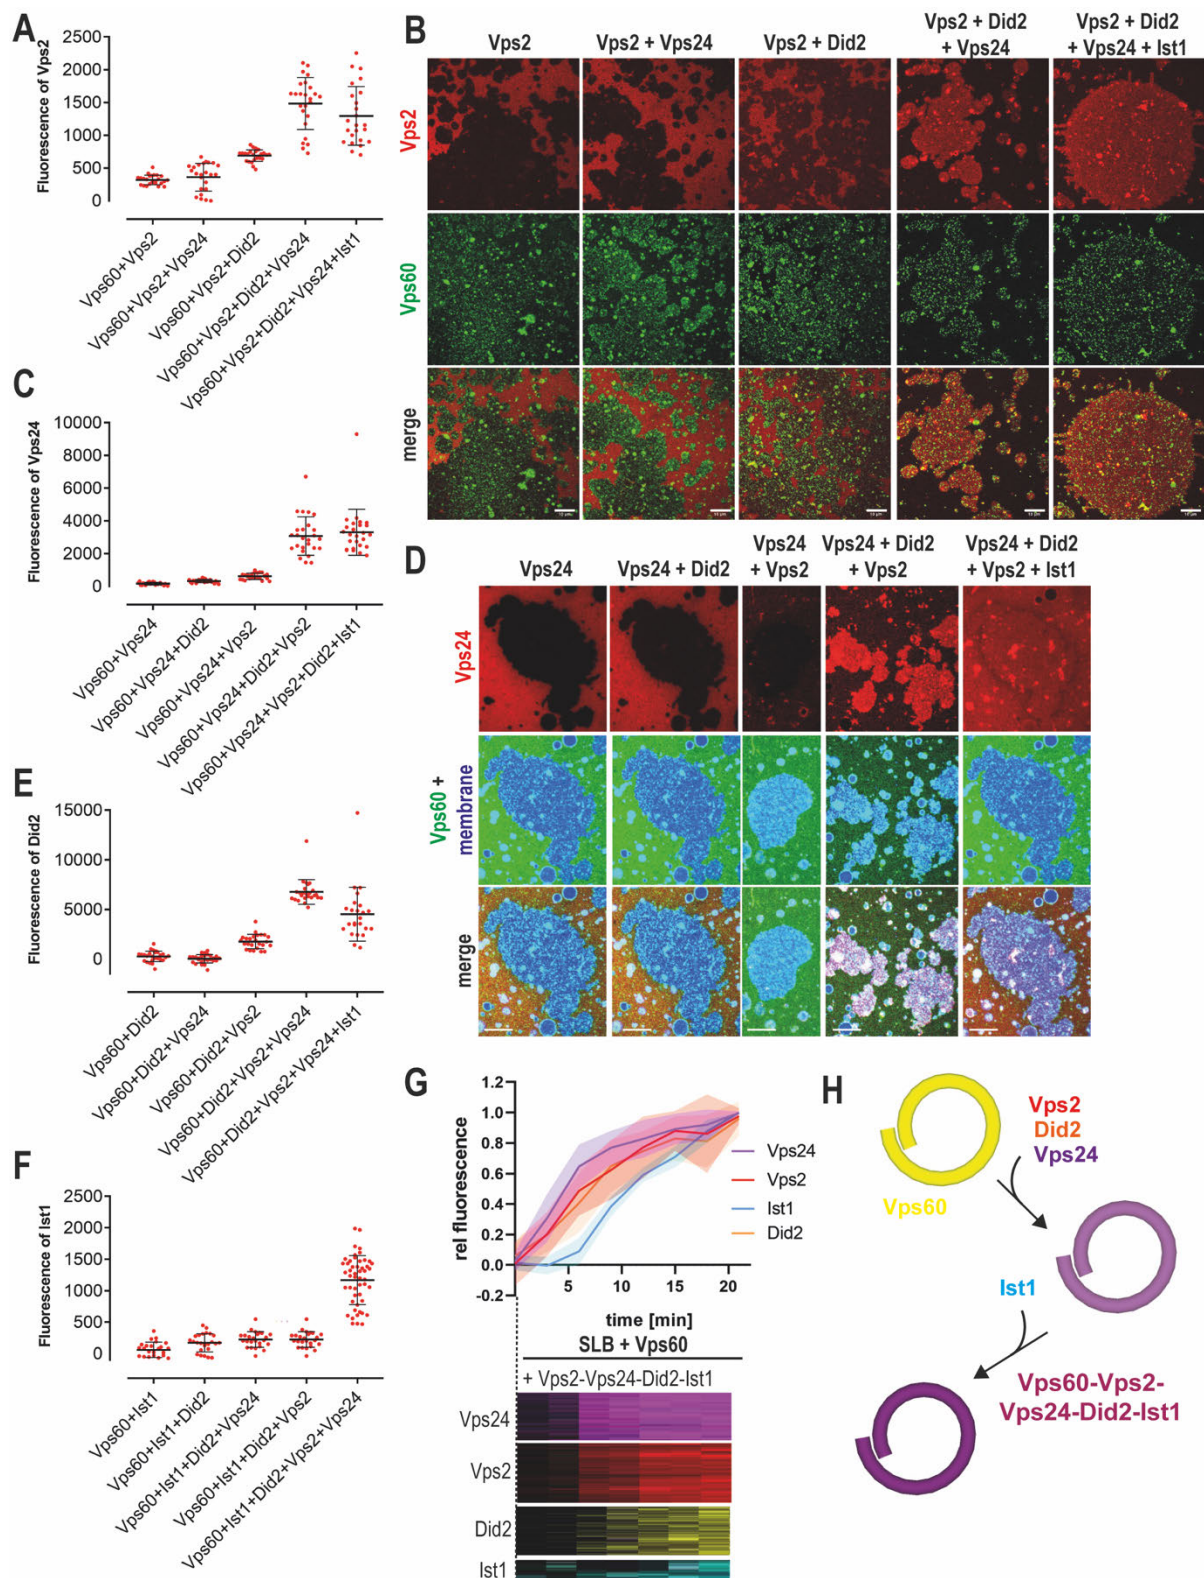

586

587 **Figure 4. Vps60 recruit ESCRT-III subunits to membrane.**

588 A-B. Quantification of Vps2 fluorescence (A) and confocal images (B) of Vps60-covered SLBs  
 589 incubated with Alexa488-Vps2 and the indicated protein mixture. C-D. Quantification of Vps24  
 590 fluorescence (C) and confocal images (D) of Vps60-covered SLBs incubated with Alexa488-Vps24 and  
 591 the indicated protein mixture. E. Quantification of Did2 fluorescence of Vps60-covered SLBs incubated  
 592 with Alexa488-Vps24 and the indicated protein mixture. F. Quantification of Ist1 fluorescence of  
 593 Vps60-covered SLBs incubated with Alexa488-Vps24 and the indicated protein mixture. G.

594 Kymographs and quantification of timelapse-experiments of Vps60-covered SLBs incubated with  
595 Alexa488-Vps24 (purple), Alexa488-Vps2 (red), Alexa488-Did2 (yellow) and Alexa488-Ist1 (cyan).  
596 H. Schematic representation of model for sequential binding of ESCRT-III subunits to Vps60-polymers.  
597

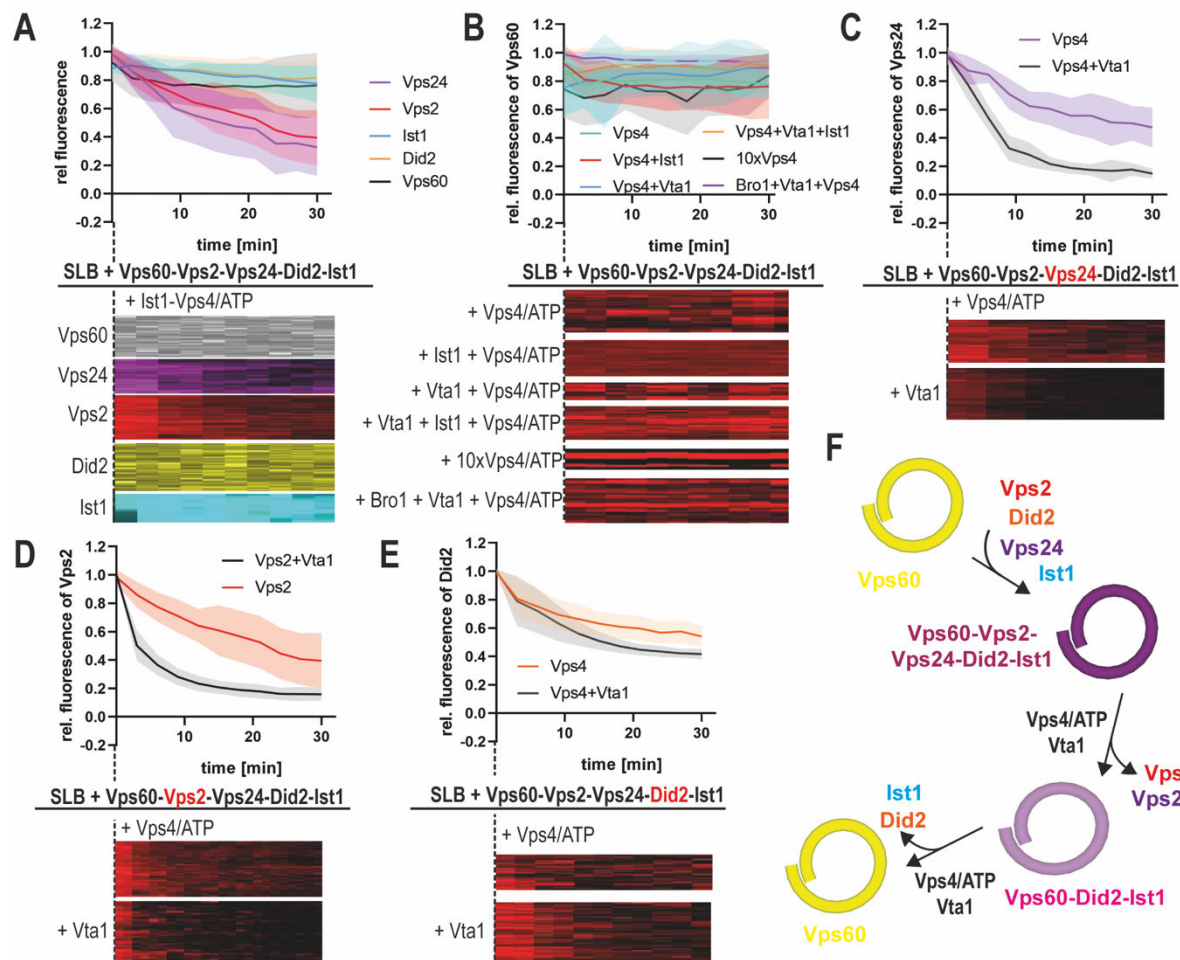

598

599 **Figure 5. Vps4 triggers turnover of Vps60-based ESCRT-III polymers.**

600 A. Quantification of fluorescence intensities of indicated subunit and kymographs of timelapse  
 601 experiments of addition of Ist1 and Vps4/ATP to SLBs pre-incubated with Vps60, Vps2, Vps24, Did2  
 602 and Ist1. B. Quantification of fluorescence intensities of Vps60 and kymographs of timelapse  
 603 experiments of addition of Vps4/ATP and the indicated proteins to SLBs pre-incubated with Vps60,  
 604 Vps2, Vps24, Did2 and Ist1. C. Quantification of Vps24 fluorescence intensities and kymographs of  
 605 timelapse experiments of addition of Vps4/ATP and Vta1 where indicated to SLBs pre-incubated with  
 606 Vps60, Vps2, Alexa488-Vps24, Did2 and Ist1. D. Quantification of Vps2 fluorescence intensities and  
 607 kymographs of timelapse experiments of addition of Vps4/ATP and Vta1 where indicated to SLBs pre-  
 608 incubated with Vps60, Vps24, Alexa488-Vps2, Did2 and Ist1. E. Quantification of Did2 fluorescence  
 609 intensities and kymographs of timelapse experiments of addition of Vps4/ATP and Vta1 where  
 610 indicated to SLBs pre-incubated with Vps60, Vps2, Vps24, Alexa488-Did2 and Ist1. F. Cartoon of the  
 611 model for Vps4-triggered sequential disassembly of Vps60-based ESCRT-III polymer.

612

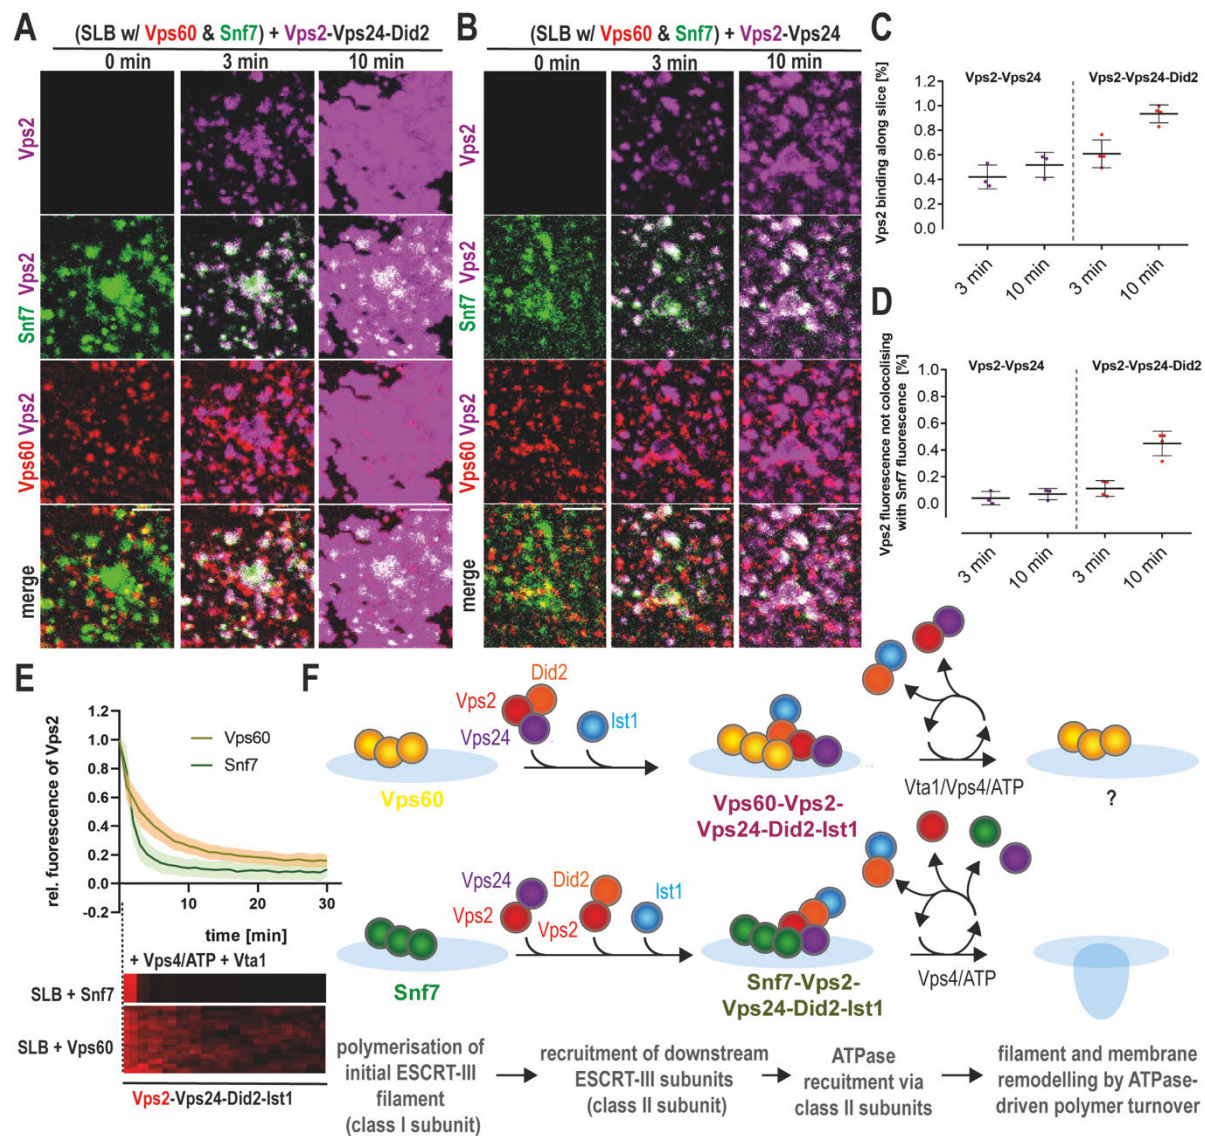

613

614 **Figure 6. Comparison of Snf7-based and Vps60-based ESCRT-III polymers.**

615 A. Confocal images of timelapse experiments of addition of Atto647-*Vps2*, *Vps24* and *Did2* to SLBs  
 616 pre-incubated with *Snf7* (green) and *Vps60* (red). B. Confocal images of timelapse experiments of  
 617 addition of Atto647-*Vps2* and *Vps24* to SLBs pre-incubated with *Snf7* (green) and *Vps60* (red). C-D  
 618 Quantification of *Vps2* fluorescence intensities total membrane coverage and non-colocalization with  
 619 *SNF7*-patches from experiments described in A and B. E. Quantification of *Vps2* intensity and  
 620 kymographs of timelapse experiments of addition of *Vta1* and *Vps4*/ATP to SLBs pre-incubated with  
 621 *Vps2*, *Vps24*, *Did1* *Ist1* and *Snf7* or *Vps60*. F. Cartoon of proposed model for function of *Vps60*-based  
 622 ESCRT-III filaments.

623

624 **Extended Data Figures**

625

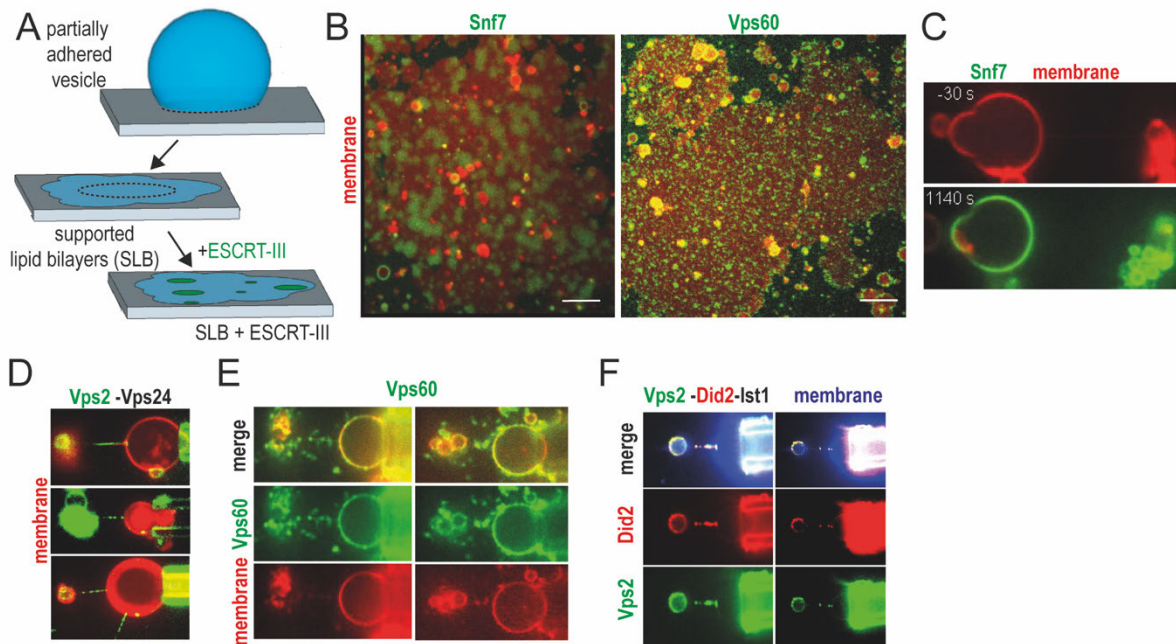

626

627 **Figure S1. Characterization of ESCRT-III protein properties.**

628 A. Schematic presentation of SLBs formation. B. Confocal images of Snf7 (green) o. Vps60 (green)  
629 nucleation on SLBs (red). C. Confocal microscopy images of Snf7-Alex488 (green) binding to  
630 membrane nanotubes (red). D. Confocal microscopy images of Vps60 (green) binding to membrane  
631 nanotubes (red). E. Confocal microscopy images of Vps2-Alex488 (green) and Vps24 binding to  
632 membrane nanotubes (red). F. Confocal microscopy images of Vps2-Alex488 (green), Did2-Atto565  
633 (red) and Ist1 binding to membrane nanotubes (blue).

634



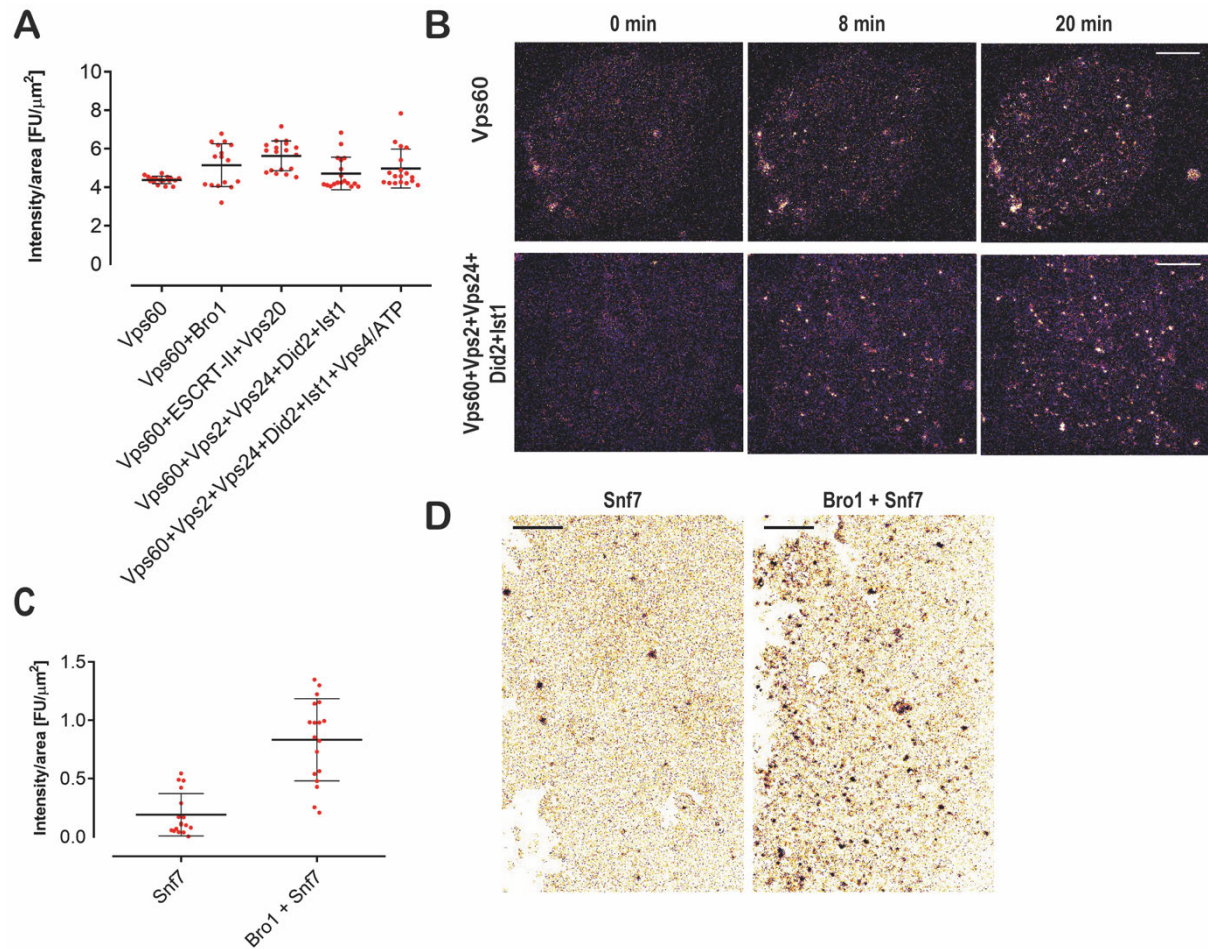

635

636 **Figure S2. Vps60 nucleation pattern on SLBs.**

637 A. Quantification Vps60 intensity from experiments described in Fig. 2A. B. Confocal images of  
638 timelapse experiments of SLBs incubated with the indicated mixture of proteins (scale bar 10  $\mu\text{m}$ ). C-  
639 D. Quantification of Snf7 intensity (C) and confocal images (D) of SLBs incubated with Alexa488-  
640 Snf7 or Alexa488-Snf7 and Bro1.

641

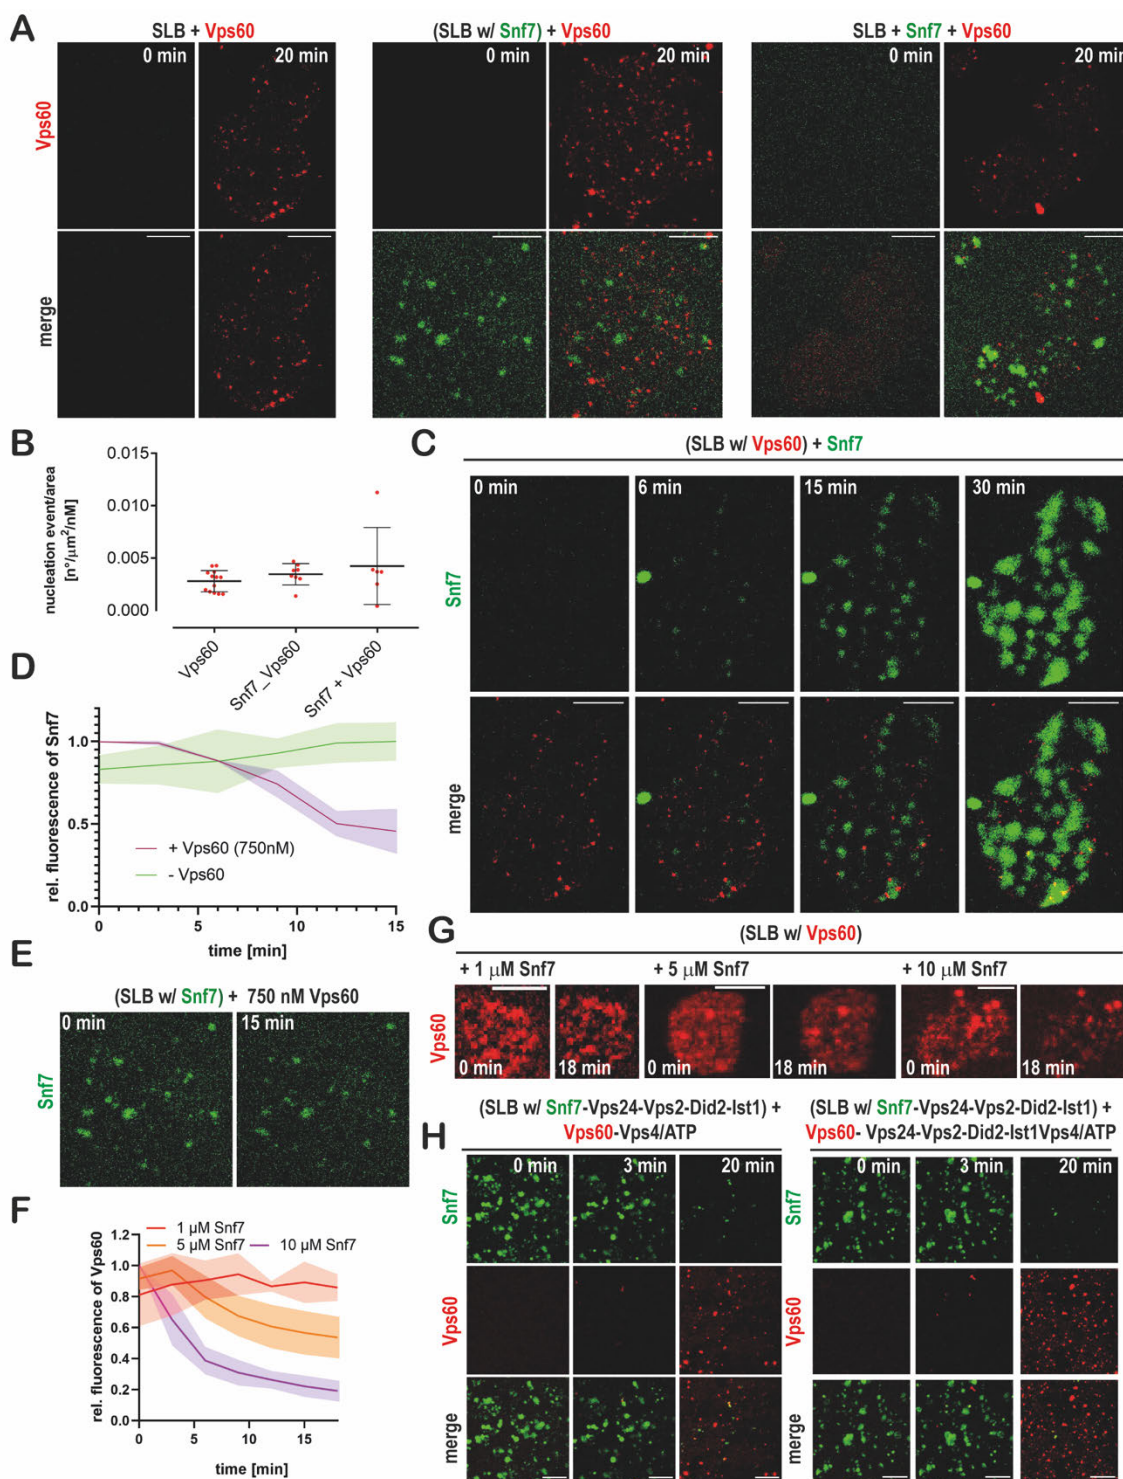

642

643 **Figure S3. Vps60 and Snf7 bind membrane independently from each other.**

644 A. Confocal images from experiments described in Fig. 3A. B. Quantification of Vps60 intensity from  
 645 experiments described in Fig. 3A. C. Confocal images of timelapse experiments of addition of  
 646 Alexa488-Snf7 to Vps60-covered SLBs. D-E. Quantification of Snf7 intensity (E) and confocal  
 647 images (D) of timelapse experiments of addition of Vps60 (unlabelled) to SLBs with pre-grown Snf7-  
 648 patches.

649

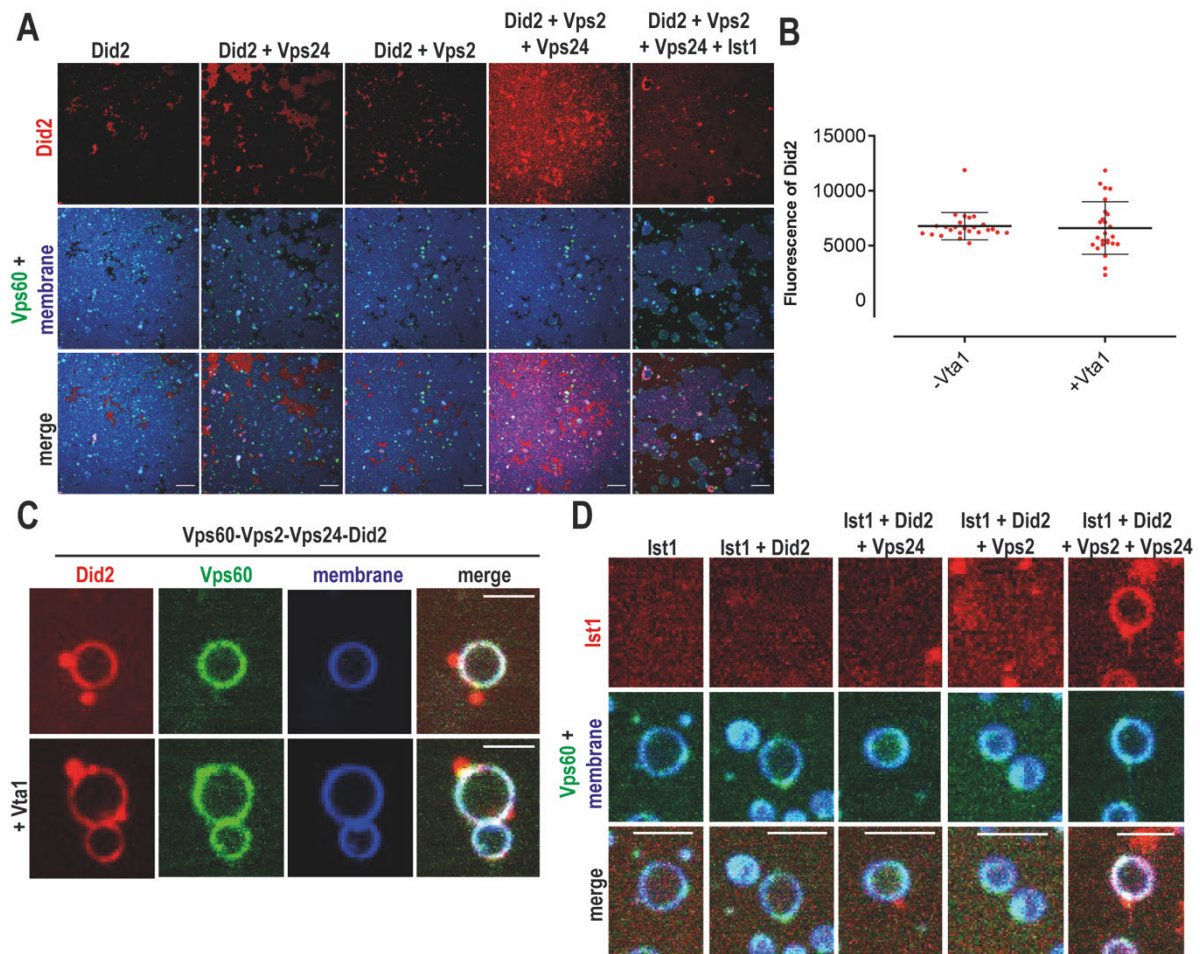

650

651 **Figure S4. Membrane-bound Vps60 recruits ESCRT-III proteins.**

652 A. Confocal images of experiments described in Fig. 4E. B-C. Quantification of Did2 intensity (B) and  
 653 confocal images (C) of Vps60-covered SLBs incubated with Vps2, Vps24, Alexa488-Did2 and Ist1 in  
 654 presence or absence of Vta1. D. Confocal images of experiments described in Fig. 4F.

655

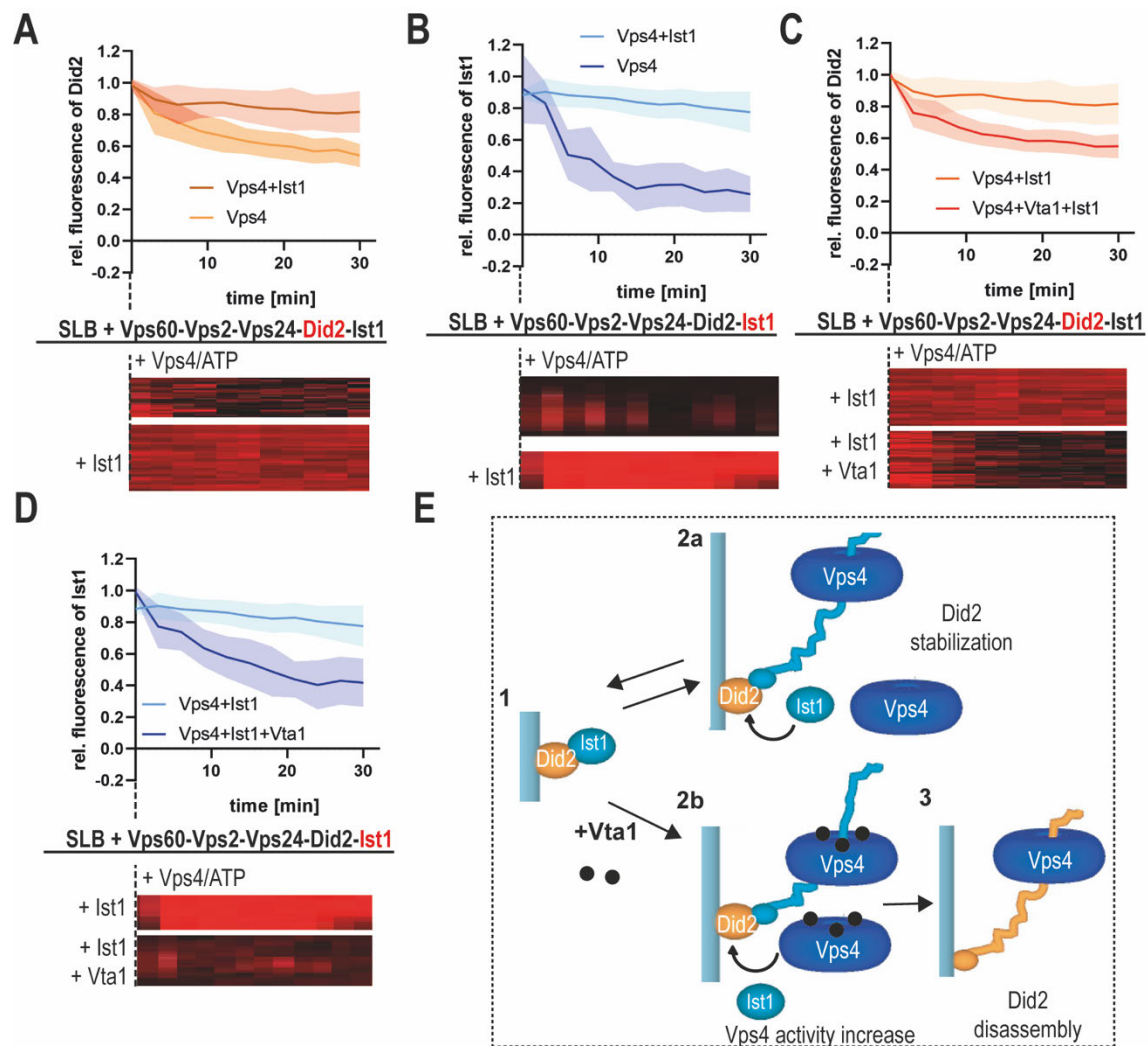

656

657 **Figure S5. Vps4-triggered depolymerization of Did2 and Ist1 from Vps60-based ESCRT-III**  
 658 **filaments.**

659 A. Quantification of Did2 intensity and kymographs of timelapse experiments of addition of Vps4/ATP  
 660 or Ist1 and Vps4/ATP to SLBs pre-incubated with Vps60, Vps2, Vps24, Alexa488-Did2 and Ist1. B.  
 661 Quantification of Ist1 intensity and kymographs of timelapse experiments of addition of Vps4/ATP or  
 662 Ist1 and Vps4/ATP to SLBs pre-incubated with Vps60, Vps2, Vps24, Did2 and Alexa488-Ist1. C.  
 663 Quantification of Did2 intensity and kymographs of timelapse experiments of addition of Ist1 and  
 664 Vps4/ATP or Ist1, Vps4/ATP or Vta1 to SLBs pre-incubated with Vps60, Vps2, Vps24, Alexa488-  
 665 Did2 and Ist1. B. Quantification of Ist1 intensity and kymographs of timelapse experiments of addition  
 666 of Ist1 and Vps4/ATP or Ist1, Vps4/ATP or Vta1 to SLBs pre-incubated with Vps60, Vps2, Vps24,  
 667 Did2 and Alexa488-Ist1. E. Cartoon of the model for interplay of Vps4, Did2 and Ist1 during  
 668 disassembly of ESCRT-III polymers in presence or absence of Vta1.

669

670
